# Supplementary material for: Denticulatains A and B: unique stilbene–diterpene heterodimers from Macaranga denticulata
Source: Royal Society of Chemistry journal article supplement (doi:10.1039/c4ra14805c), 2015-01-01

## Electronic Supporting Information (ESI) for

### Denticulatains A and B: unique stilbene–diterpene heterodimers from *Macaranga denticulata*

Da-Song Yang,<sup>‡a</sup> Zi-Lei Li,<sup>‡a</sup> Xue Wang,<sup>b</sup> Hui Yan,<sup>c</sup> Yong-Ping Yang,<sup>a</sup> Huai-Rong Luo,<sup>c</sup> Ke-Chun Liu,<sup>b</sup> Wei-Lie Xiao\*<sup>c</sup>, and Xiao-Li Li\*<sup>a</sup>

<sup>a</sup> *Key Laboratory of Economic Plants and Biotechnology; Germplasm Bank of Wild Species in Southwest China; Institute of Tibetan Plateau Research at Kunming, Kunming Institute of Botany, Chinese Academy of Sciences, Kunming 650201, P. R. China*

<sup>b</sup> *Biology Institute of Shandong Academy of Sciences, Jinan 250014, P. R. China*

<sup>c</sup> *State Key Laboratory of Phytochemistry and Plant Resources in West China, Kunming Institute of Botany, Chinese Academy of Sciences, Kunming 650201, P. R. China*

---

\* Corresponding author. E-mail: xwl@mail.kib.ac.cn and li\_xiaoli11@mail.kib.ac.cn. Tel./fax: +86-871-65223231.

‡ These authors contributed equally to this work.

## Contents of supporting information

| No. | Contents                                                                        | Pages |
|-----|---------------------------------------------------------------------------------|-------|
| 1   | Detailed experimental procedures                                                | 3     |
| 2   | Figure S1. <sup>1</sup> H NMR spectrum of denticulatain A (1)                   | 5     |
| 3   | Figure S2. <sup>13</sup> C NMR spectrum of denticulatain A (1)                  | 6     |
| 4   | Figure S3. HSQC spectrum of denticulatain A (1)                                 | 7     |
| 5   | Figure S4. HMBC spectrum of denticulatain A (1)                                 | 8     |
| 6   | Figure S5. <sup>1</sup> H- <sup>1</sup> H COSY spectrum of denticulatain A (1)  | 9     |
| 7   | Figure S6. ROESY spectrum of denticulatain A (1)                                | 10    |
| 8   | Figure S7. ESIMS of denticulatain A (1)                                         | 11    |
| 9   | Figure S8. HRESIMS of denticulatain A (1)                                       | 12    |
| 10  | Figure S9. IR spectrum of denticulatain A (1)                                   | 14    |
| 11  | Figure S10. UV spectrum of denticulatain A (1)                                  | 15    |
| 12  | Figure S11. ORD spectrum of denticulatain A (1)                                 | 16    |
| 13  | Figure S12. <sup>1</sup> H NMR spectrum of denticulatain B (2)                  | 17    |
| 14  | Figure S13. <sup>13</sup> C NMR spectrum of denticulatain B (2)                 | 18    |
| 15  | Figure S14. HSQC spectrum of denticulatain B (2)                                | 19    |
| 16  | Figure S15. HMBC spectrum of denticulatain B (2)                                | 20    |
| 17  | Figure S16. <sup>1</sup> H- <sup>1</sup> H COSY spectrum of denticulatain B (2) | 21    |
| 18  | Figure S17. ROESY spectrum of denticulatain B (2)                               | 22    |
| 19  | Figure S18. ESIMS of denticulatain B (2)                                        | 23    |
| 20  | Figure S19. HRESIMS of denticulatain B (2)                                      | 24    |
| 21  | Figure S20. IR spectrum of denticulatain B (2)                                  | 26    |
| 22  | Figure S21. UV spectrum of denticulatain B (2)                                  | 27    |
| 23  | Figure S22. ORD spectrum of denticulatain B (2)                                 | 28    |

## Detailed experimental procedures

### 1. General experimental procedures.

Optical rotations were measured with a JASCO P-1020 digital polarimeter. UV data were obtained on a Shimadzu UV-2401A spectrophotometer. A Bruker Tenor 27 spectrophotometer was used for scanning IR spectroscopy with KBr pellets. 1D and 2D NMR spectra were recorded on Bruker AM-400 and DRX-500 spectrometers. Chemical shifts ( $\delta$ ) were expressed in ppm with reference to the solvent signals. ESIMS spectra were performed on a Finnigan MAT 90 instrument, HRESIMS were performed on a VG Autospec-3000 spectrometer. Column chromatography was performed with silica gel (200–300 mesh; Qingdao Marine Chemical, Inc., Qingdao, China), Lichroprep RP-18 gel (40–63  $\mu\text{m}$ , Merck, Darmstadt, Germany), and MCI gel CHP20P (75–150  $\mu\text{m}$ , Mitsubishi Chemical Corporation, Tokyo, Japan). Semipreparative HPLC was performed on a Hewlett-Packard instrument (column: Zorbax SB-C<sub>18</sub>, 250 × 9.4 mm; DAD detector). Fractions were monitored by TLC and spots were visualized by heating silica gel plates sprayed with 15% H<sub>2</sub>SO<sub>4</sub> in EtOH.

### 2. Plant material.

The fronds of *Macaranga denticulata* were collected from Xishuangbanna of Yunnan province, PR China, in March 2008. A voucher specimen (Yangyp-20080316) was deposited in the Herbarium of Kunming Institute of Botany, Chinese Academy of Sciences, which was identified by Prof. Yong-Ping Yang.

### 3. Antiangiogenesis assay.

Stock solutions (20 mg/mL) of all samples were prepared by dissolving the test compounds in 100% DMSO. These solutions were diluted in sterile salt water (5 mM NaCl, 0.17 mM KCl, 0.4 mM CaCl<sub>2</sub>, 0.16 mM MgSO<sub>4</sub>) to obtain final solutions of various concentrations in 0.2% DMSO. Aliquots were placed into 24-well plates, and embryos (TG[VEGFR2:GRCFP]) at 24 hpf (hours post-fertilization) were also transferred randomly into the above wells. Control embryos were treated with the

equivalent amount of DMSO solutions. All embryos were incubated at 28.5 °C. After 48 h treatment, the intersegmental vessels of embryos were visualized with green fluorescent protein labeling and endogenous alkaline phosphatase staining. The antiangiogenic activities of compounds were calculated from the inhibition ratio of antiangiogenesis.

#### **4. Acetylcholinesterase inhibitory activity.**

Acetylcholinesterase inhibitory activity of the compounds isolated was assayed by the spectrophotometric method developed by Ellman with slightly modification. *S*-Acetylthiocholine iodide, *S*-butyrylthiocholine iodide, 5,5'-dithio-bis-(2-nitrobenzoic) acid (DTNB, Ellman's reagent), acetylcholinesterase derived from human erythrocytes were purchased from Sigma Chemical. Compounds were dissolved in DMSO. The reaction mixture (totally 200  $\mu$ L) containing phosphate buffer (pH 8.0), test compound (50  $\mu$ M), and acetylcholinesterase (0.02 U/mL), was incubated for 20 min (30 °C). Then, the reaction was initiated by the addition of 40  $\mu$ L of solution containing DTNB (0.625 mM) and acetylthiocholine iodide (0.625 mM) for AChE inhibitory activity assay, respectively. The hydrolysis of acetylthiocholine was monitored at 405 nm every 3 minutes for one hour. Tacrine was used as positive control with final concentration of 0.333  $\mu$ M. All the reactions were performed in triplicate. The percentage inhibition was calculated as follows: % inhibition =  $(E - S)/E \times 100$  (E is the activity of the enzyme without test compound and S is the activity of enzyme with test compound).

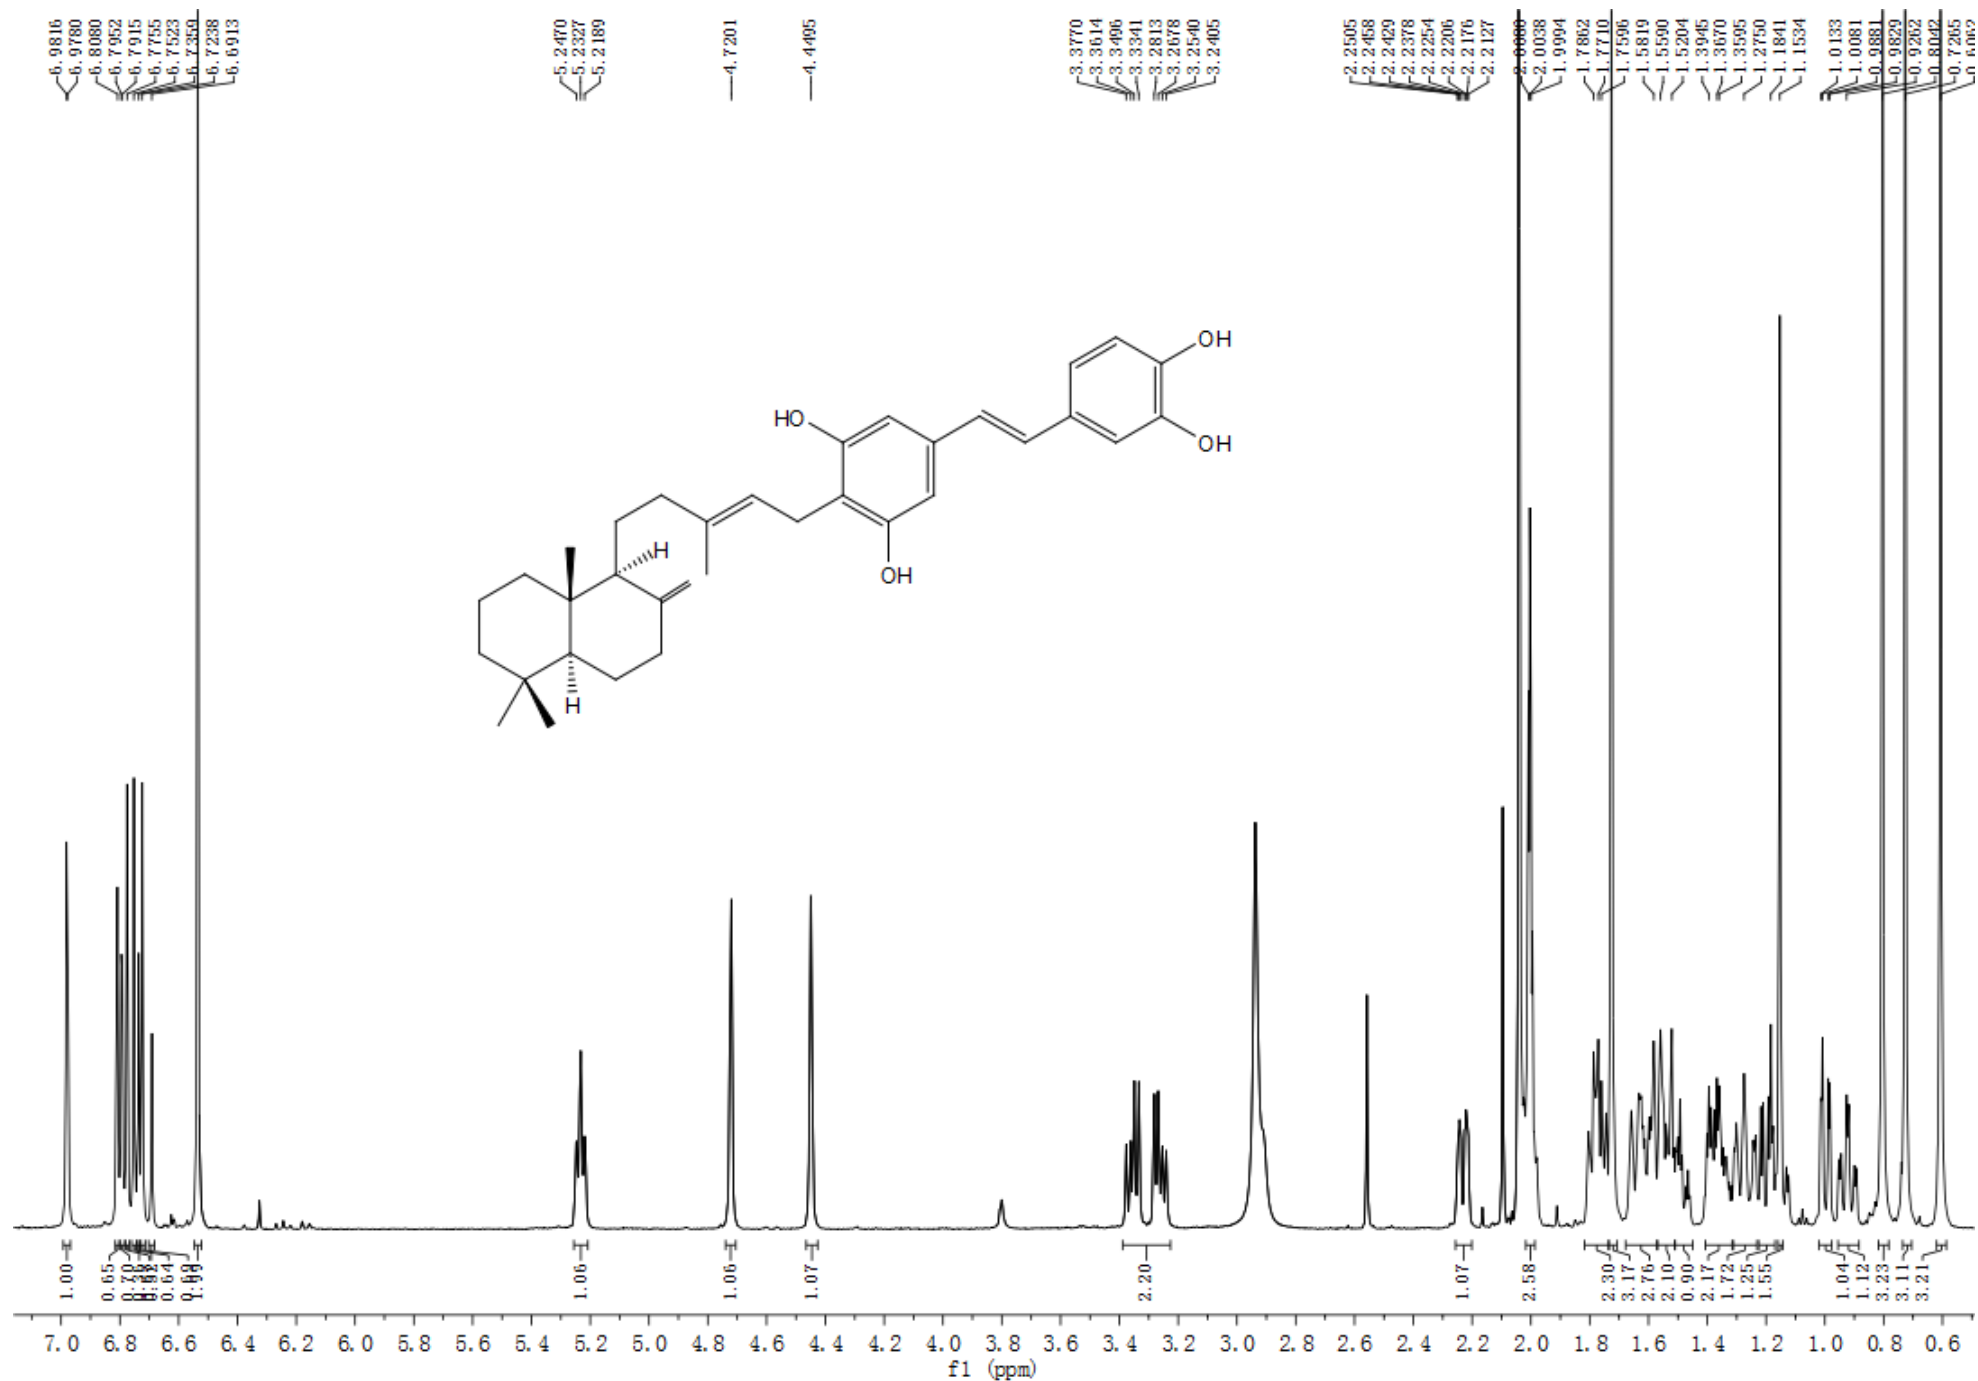

Figure S1. <sup>1</sup>H NMR spectrum of denticulatain A (1)

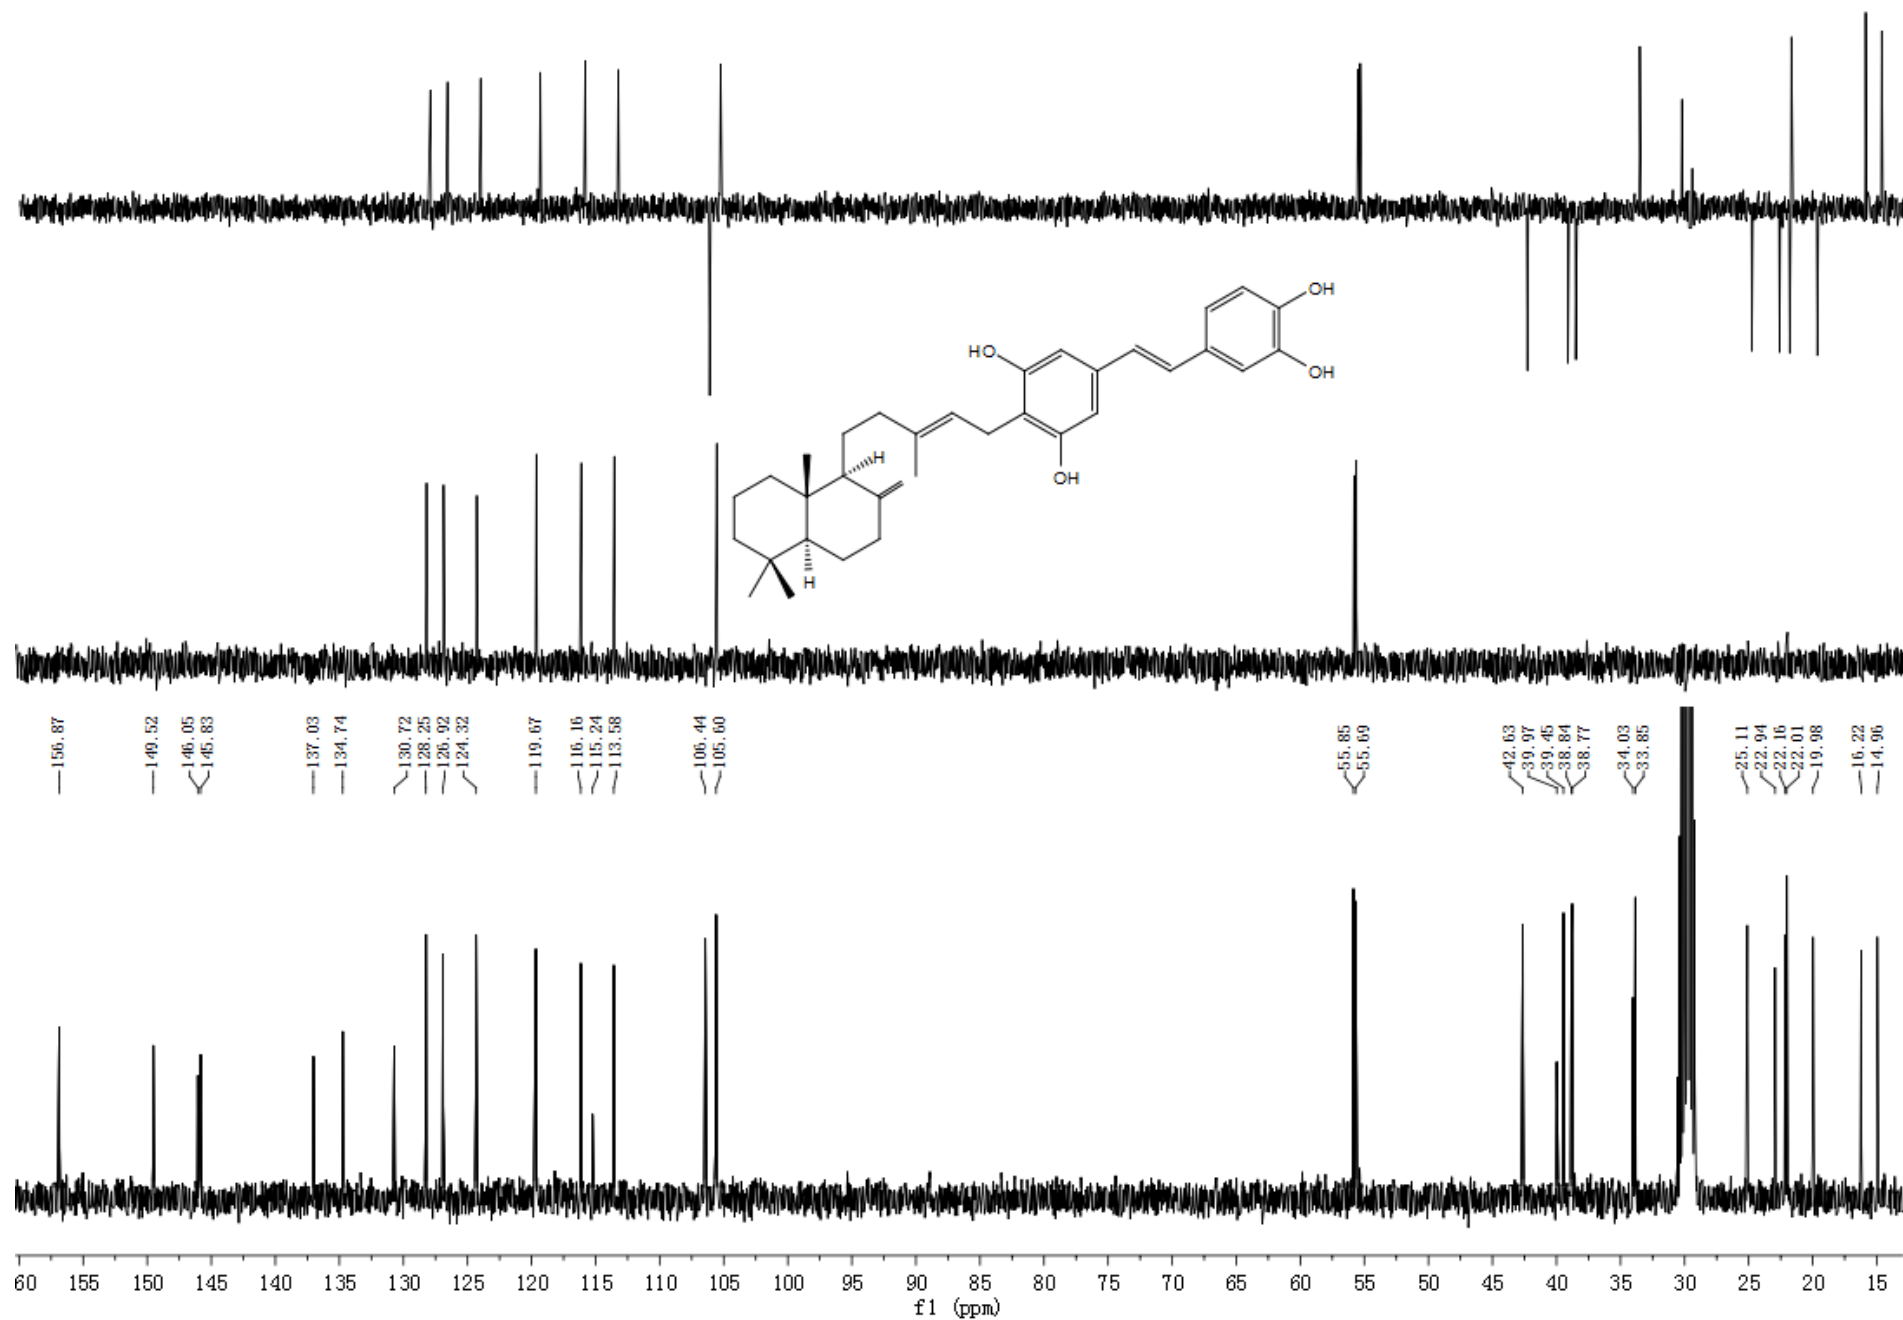

Figure S2.  $^{13}\text{C}$  NMR spectrum of denticulatin A (**1**)

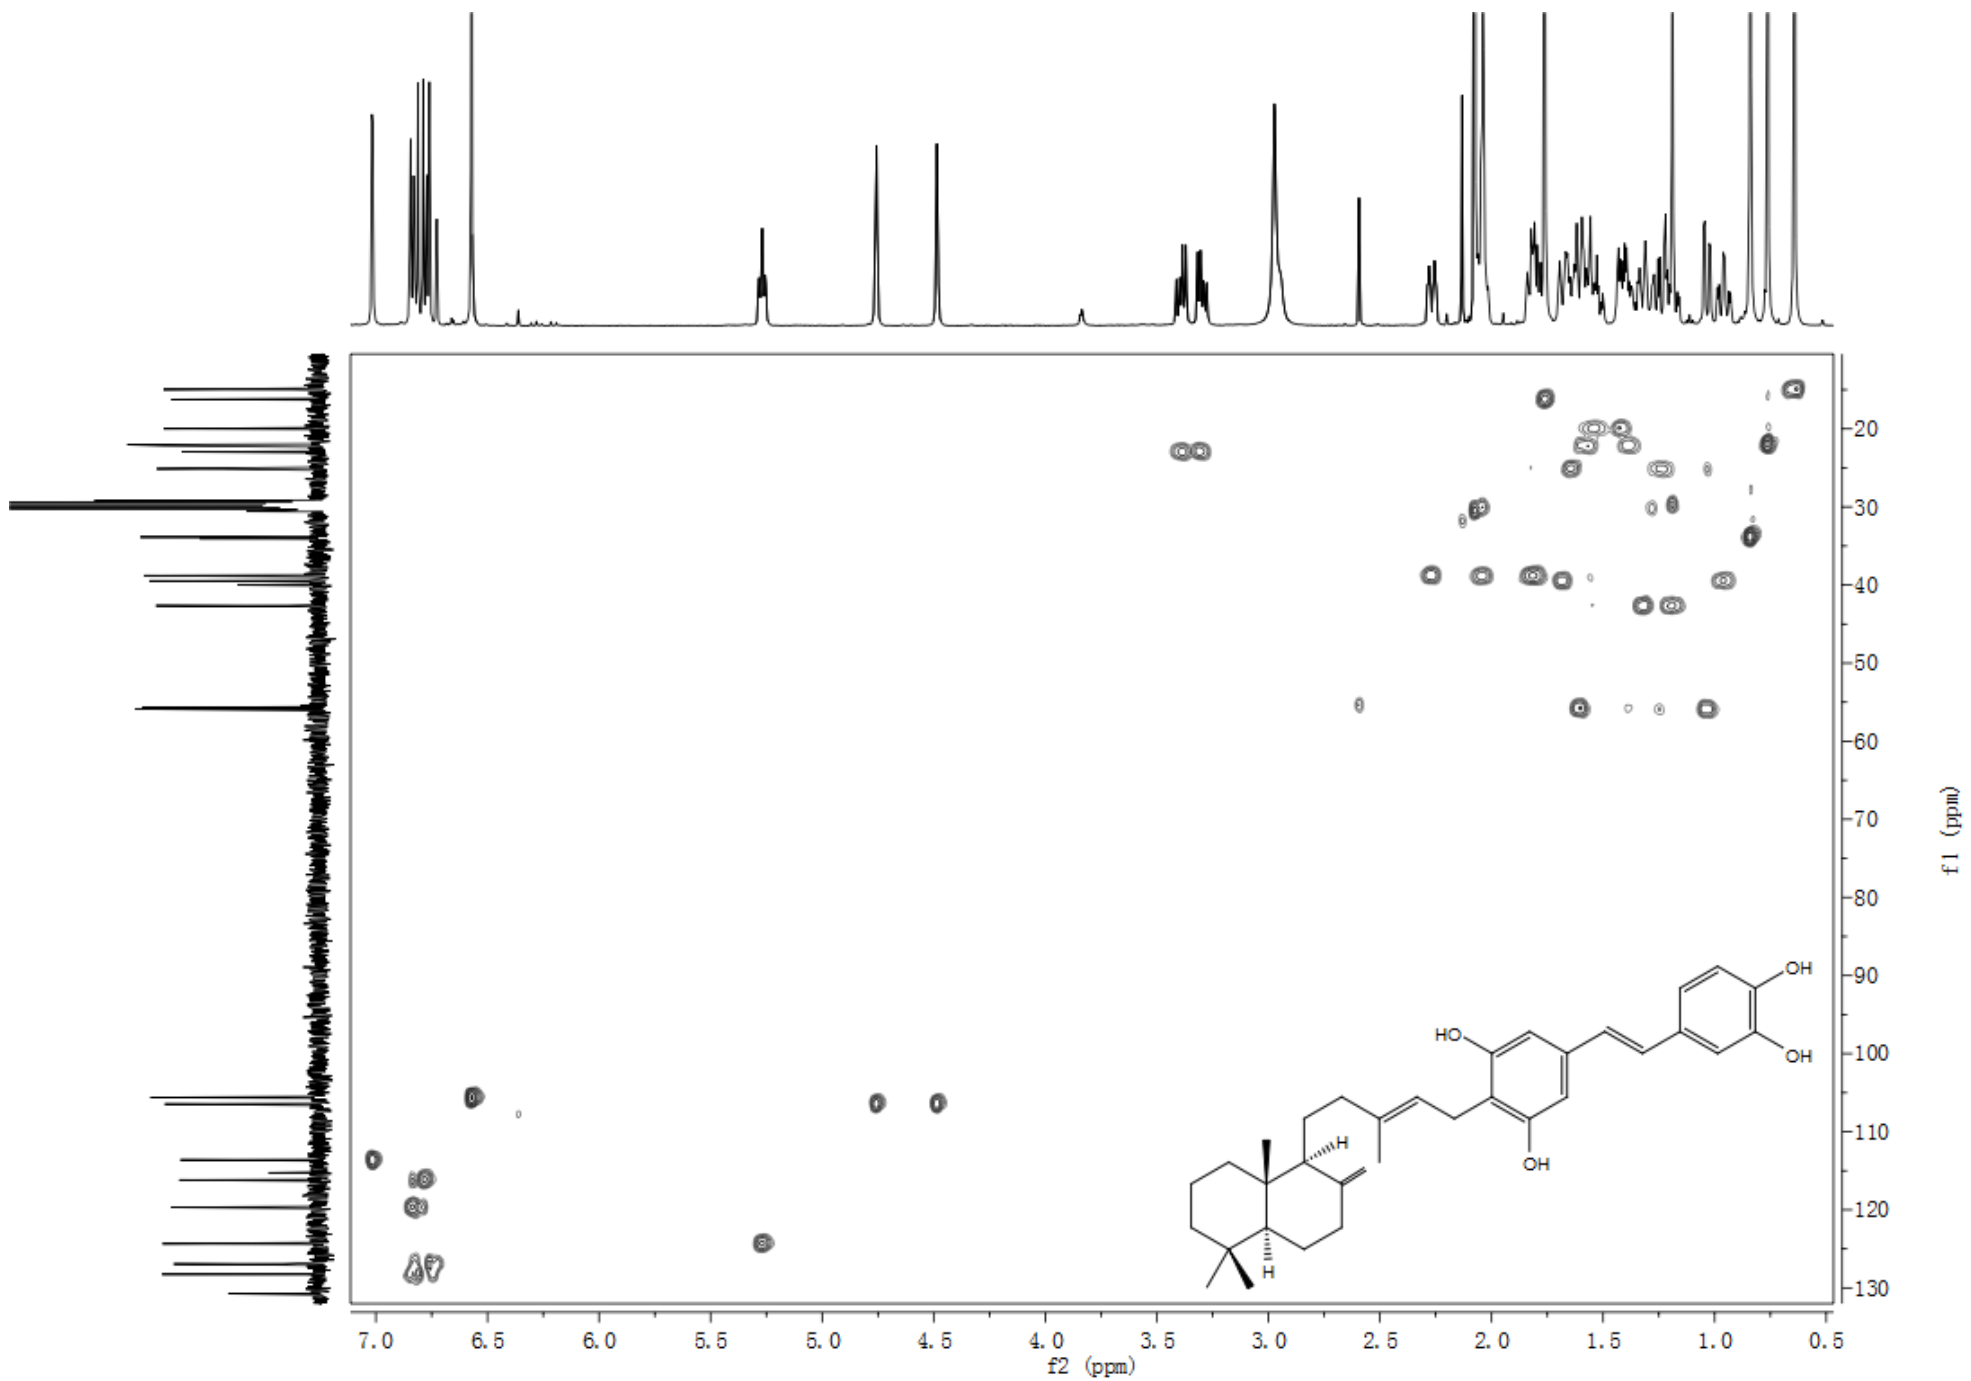

Figure S3. HSQC spectrum of denticulatin A (1)

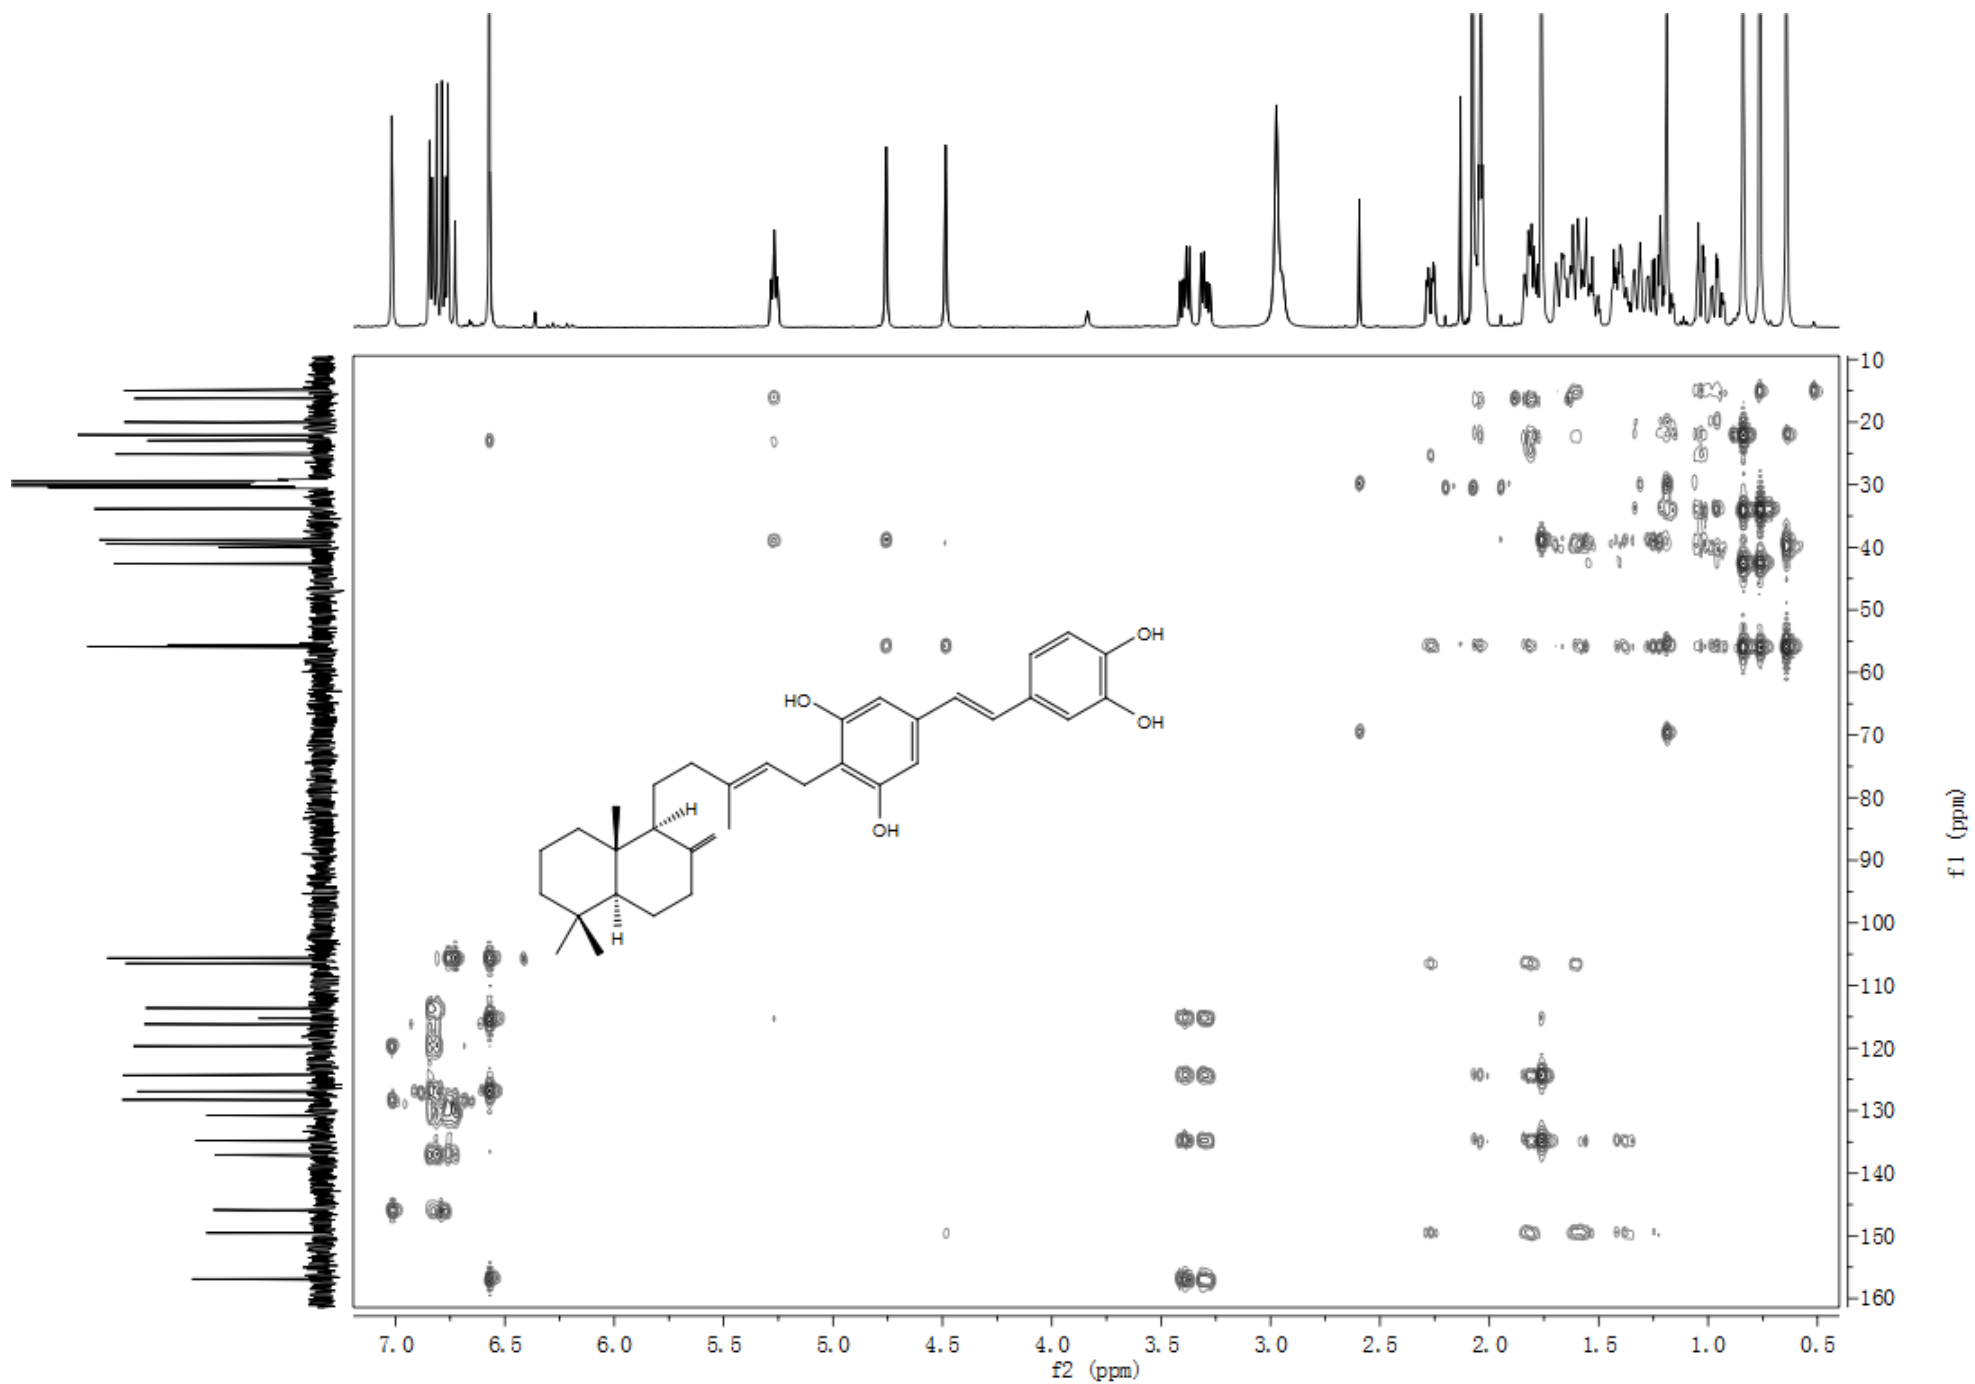

Figure S4. HMBC spectrum of denticulatin A (1)



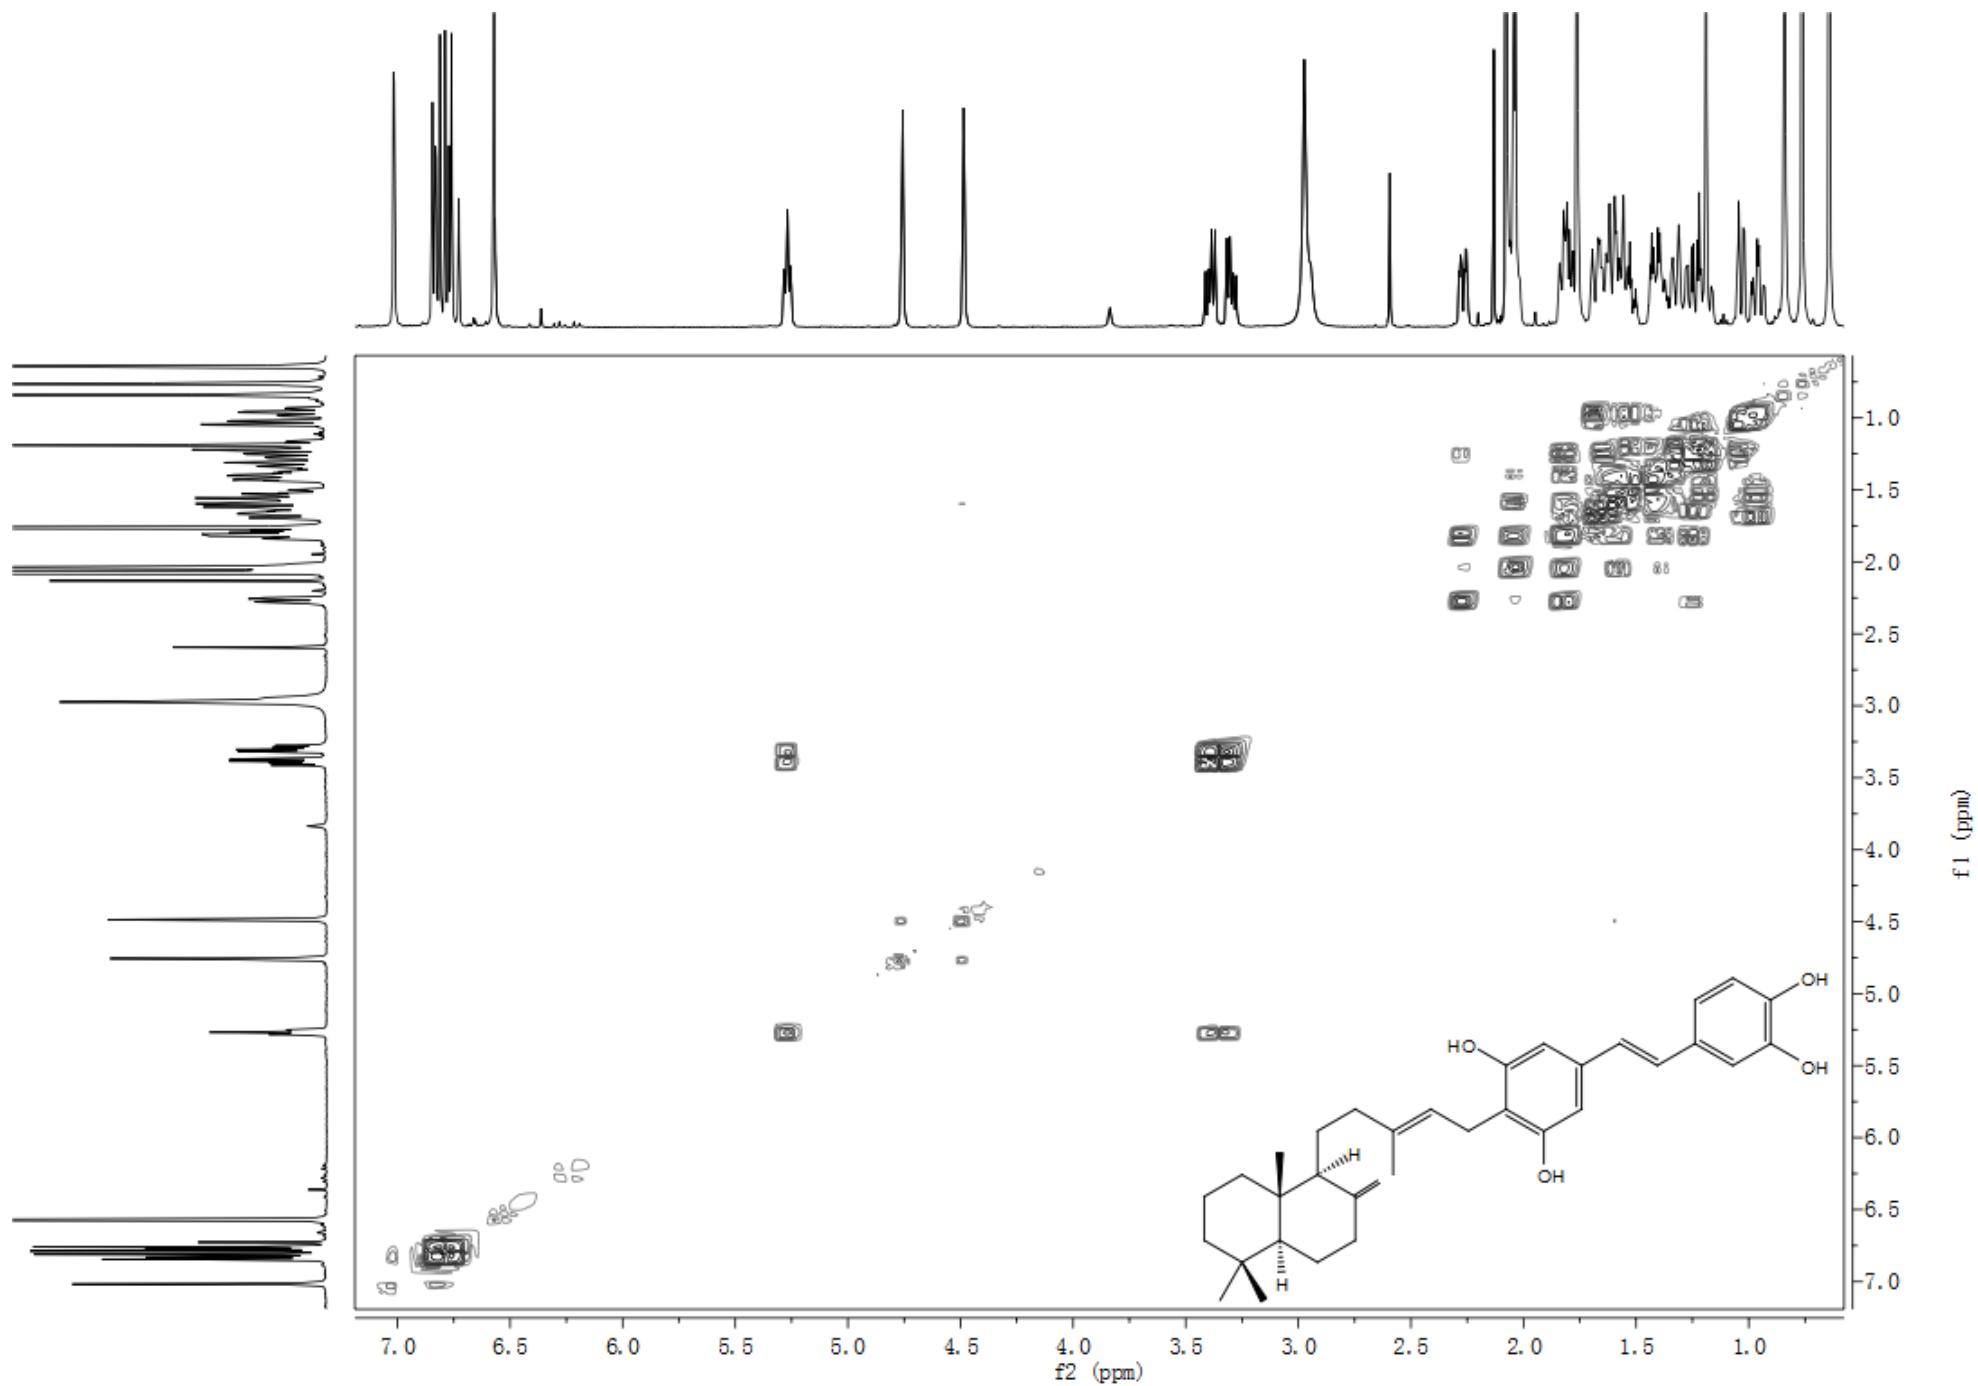

Figure S5.  $^1\text{H}$ - $^1\text{H}$  COSY spectrum of denticulatin A (**1**)

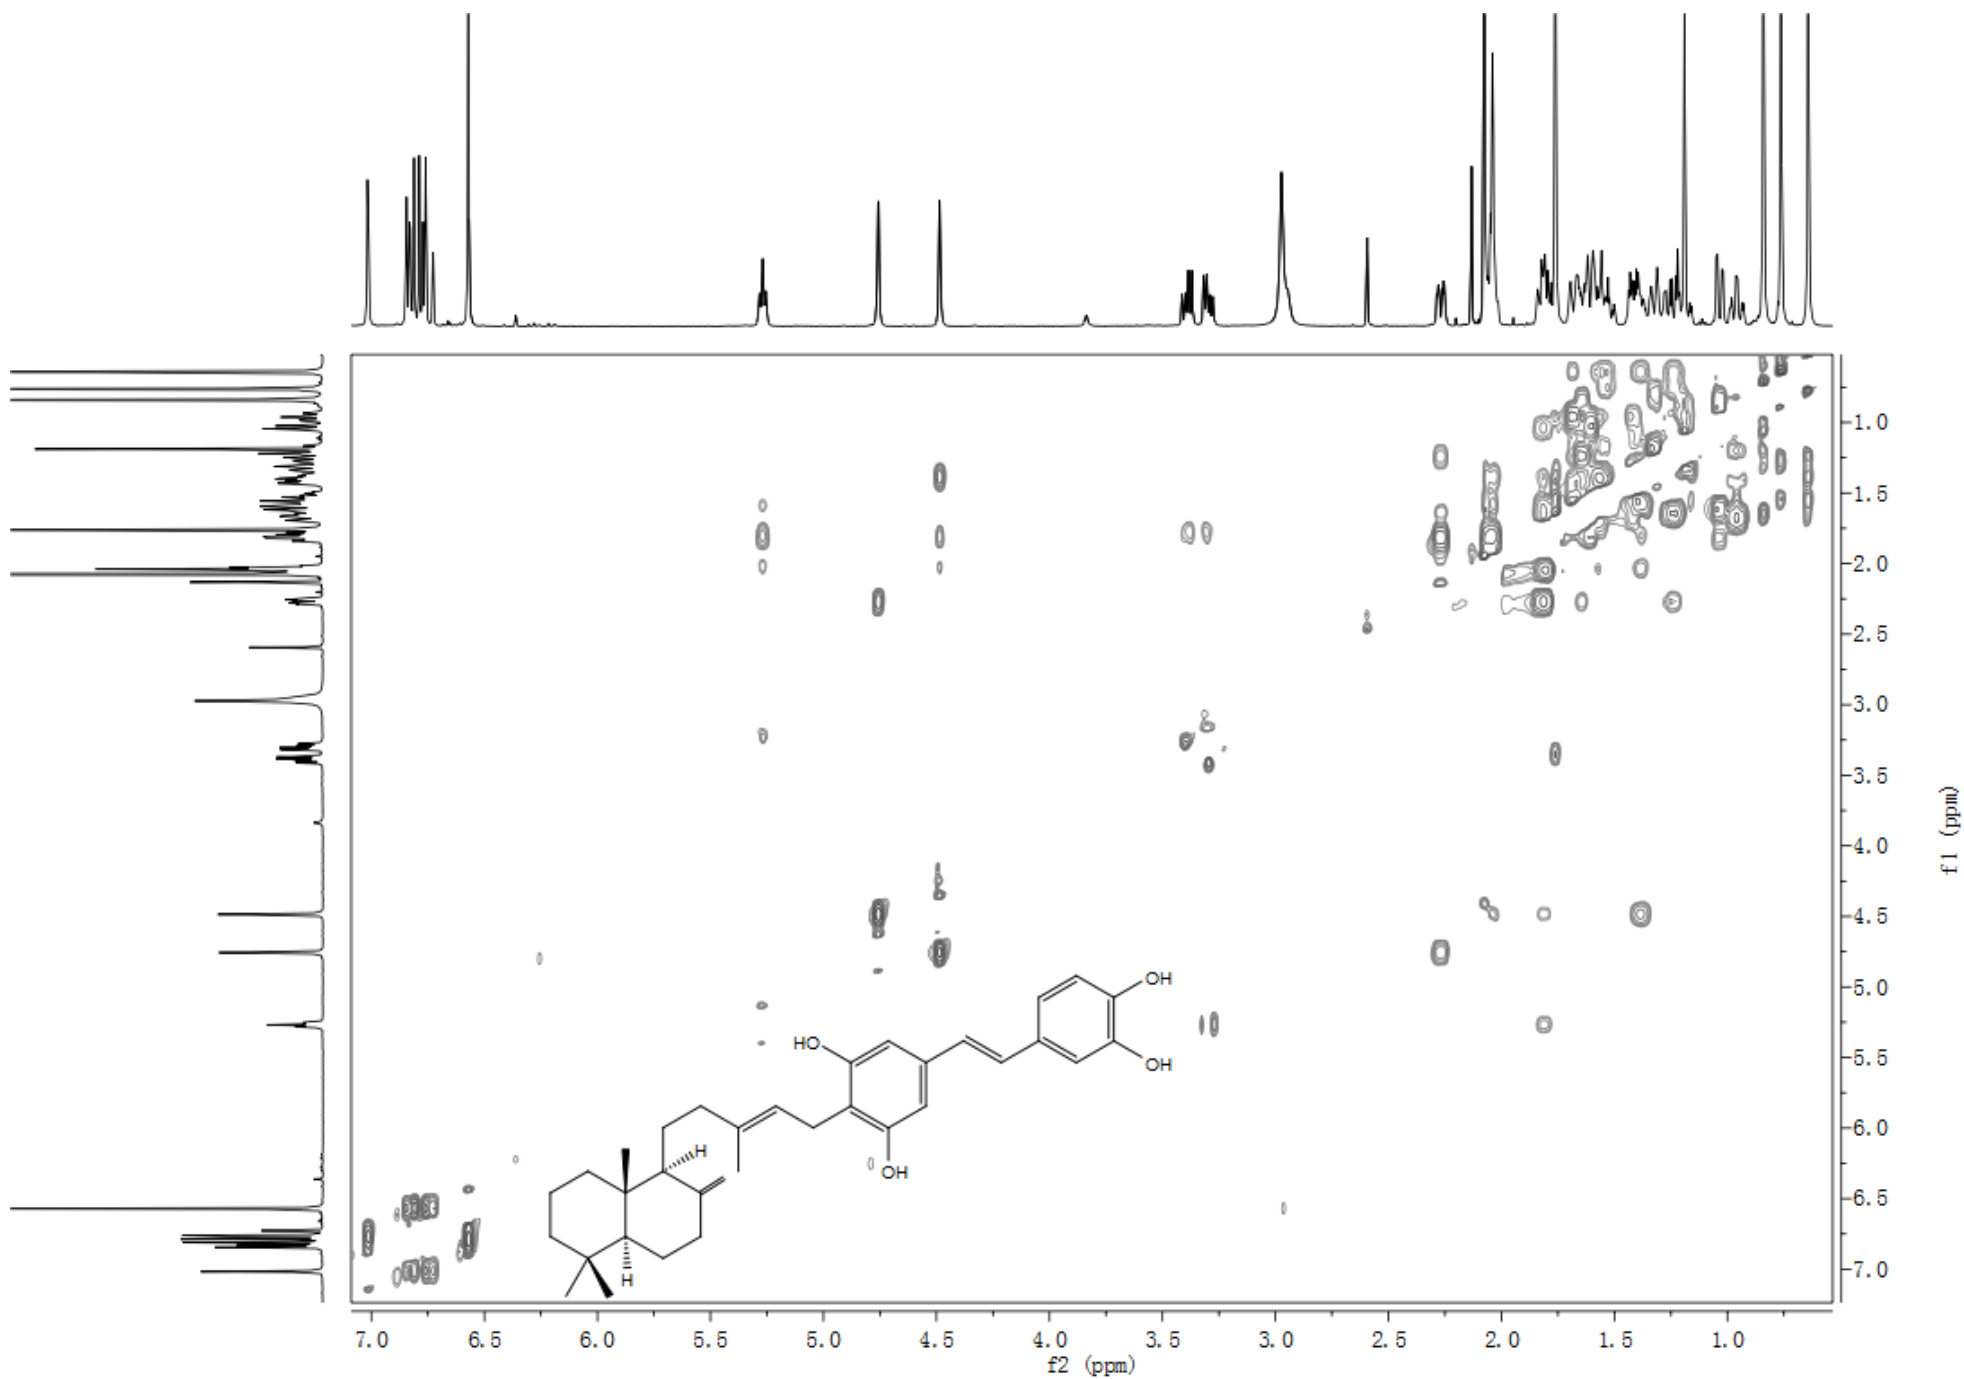

Figure S6. ROESY spectrum of denticulatin A (1)

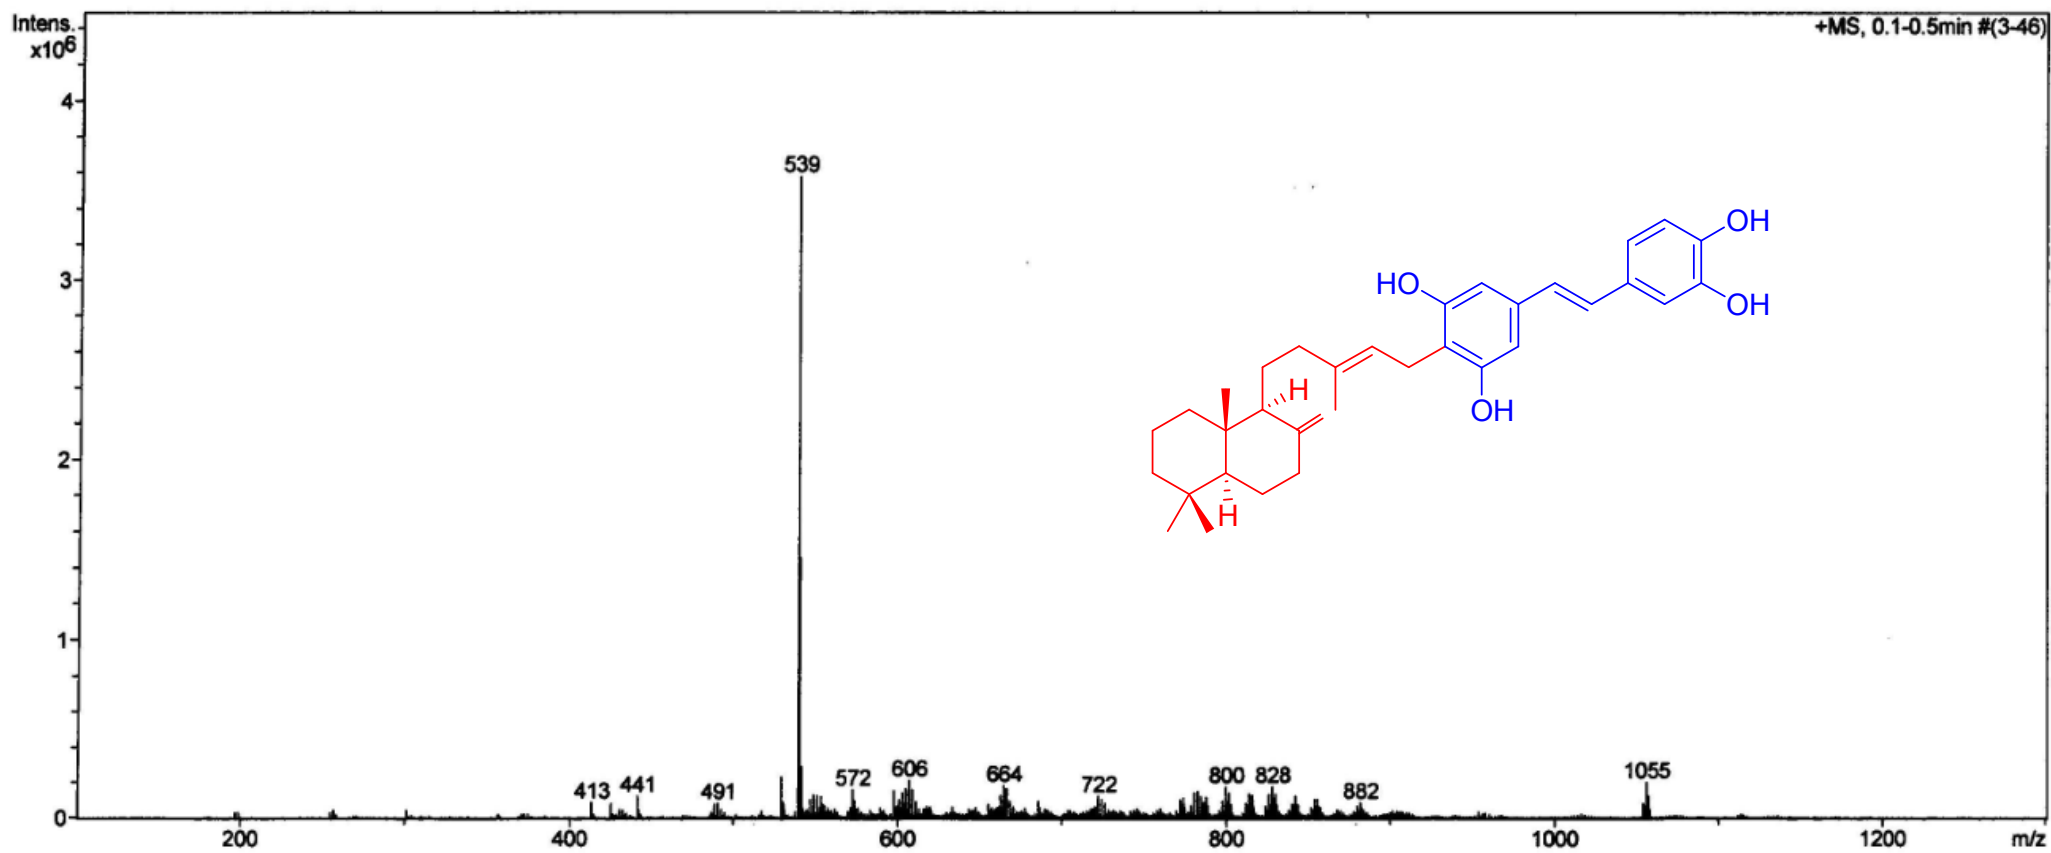

Figure S7. ESIMS of denticulatatin A (1)

## Elemental composition calculator

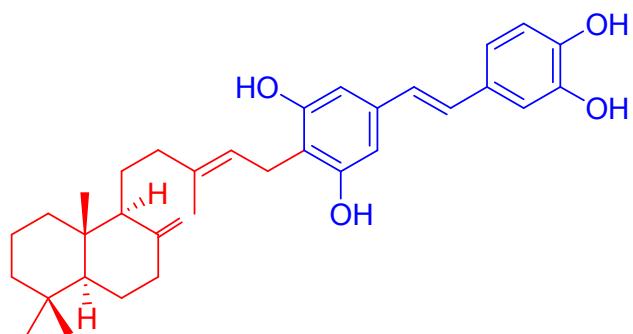

Target m/z: +539.3137 amu  
 Tolerance: +10.0000 ppm  
 Result type: Elemental  
 Max num of results: 1000  
 Min DBE: -10.0000 Max DBE: +60.0000  
 Electron state: OddAndEven  
 Num of charges: 0  
 Add water: N/A  
 Add proton: N/A  
 File Name: 111206ESIA smdl-15a.wiff

|    | Elements | Min Number | Max Number |
|----|----------|------------|------------|
| 1  | 2H       | 0          | 0          |
| 2  | Br       | 0          | 0          |
| 3  | C        | 0          | 200        |
| 4  | Cl       | 0          | 0          |
| 5  | F        | 0          | 0          |
| 6  | H        | 0          | 400        |
| 7  | I        | 0          | 0          |
| 8  | K        | 0          | 0          |
| 9  | N        | 0          | 0          |
| 10 | Na       | 1          | 1          |
| 11 | O        | 2          | 5          |

|    |    |   |   |
|----|----|---|---|
| 12 | P  | 0 | 0 |
| 13 | Pt | 0 | 0 |
| 14 | S  | 0 | 0 |
| 15 | Si | 0 | 0 |

|   | Formula       | Calculated m/z (amu) | mDa Error | PPM Error | DBE  |
|---|---------------|----------------------|-----------|-----------|------|
| 1 | C34 H44 O4 Na | 539.3137             | -0.0300   | -0.0556   | 12.5 |

Figure S8. HRESIMS of denticulatin A (1)

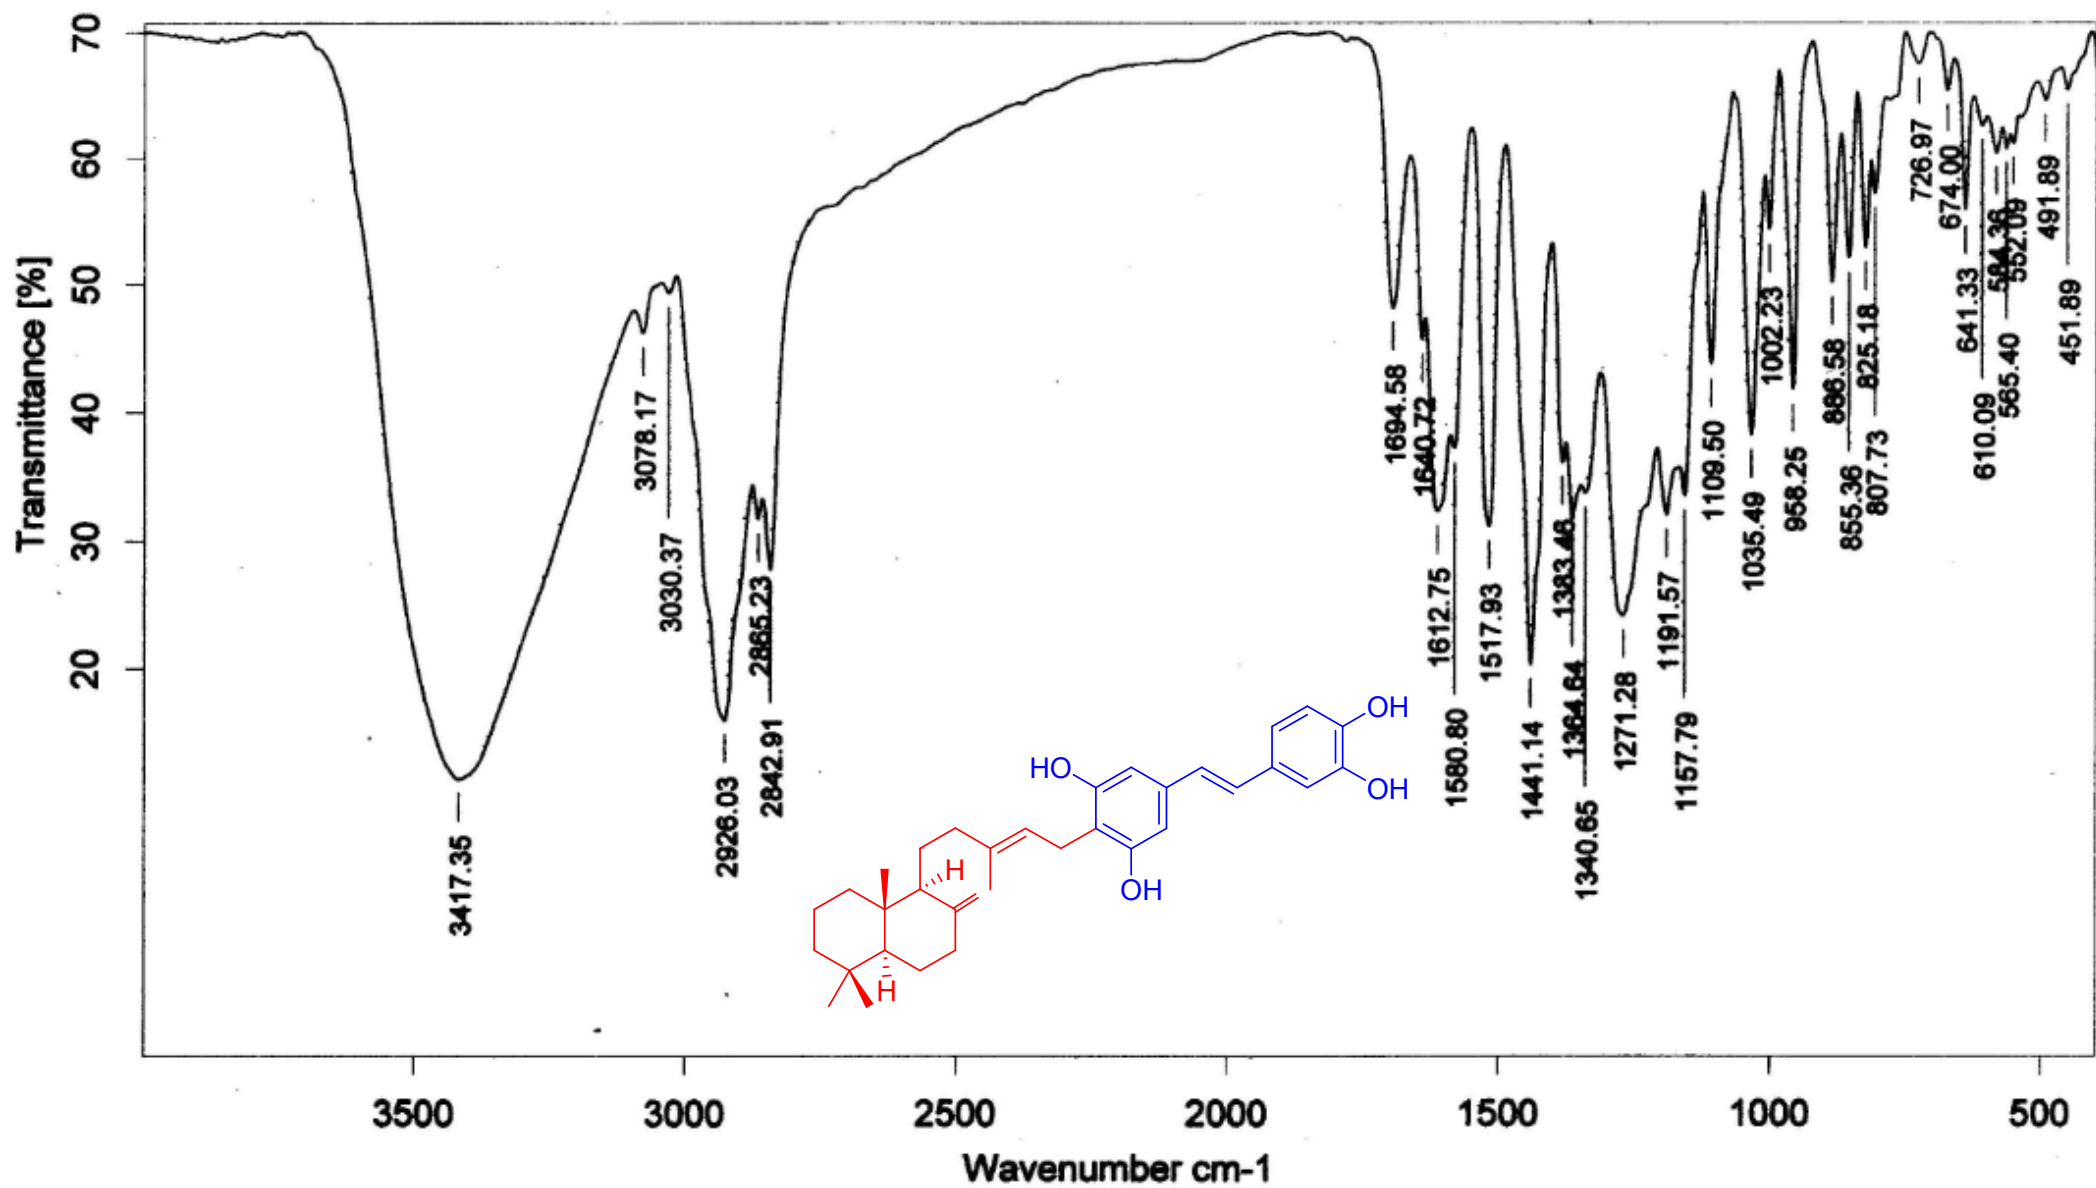

Figure S9. IR spectrum of denticulatain A (1)

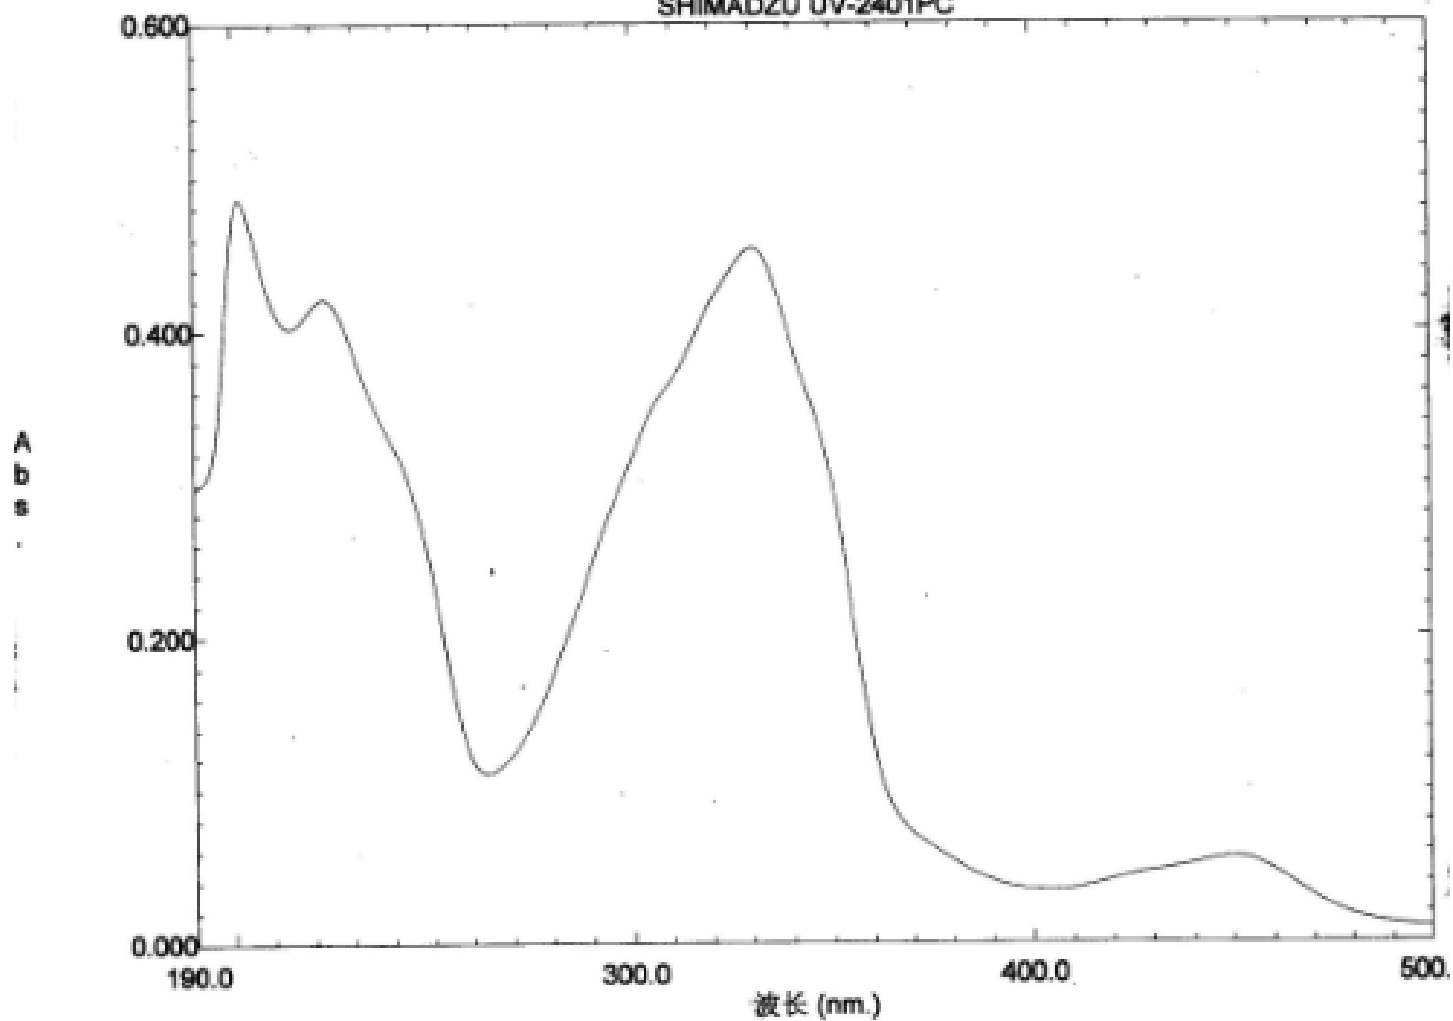

文件名: SMDL-15A

SMDL-15A

创建于: 14:53 11-12-04  
数据: 原始样品浓度: 0.0120毫克/毫升  
溶剂: 甲醇测量模式: Abs.  
扫描速度: 中速  
狭缝: 5.0  
采样间隔: 0.5

| 否. | 波长 (nm.) | Abs.   |
|----|----------|--------|
| 1  | 888.50   | 0.0053 |
| 2  | 450.50   | 0.0556 |
| 3  | 330.50   | 0.4535 |
| 4  | 223.00   | 0.4210 |
| 5  | 201.50   | 0.4862 |

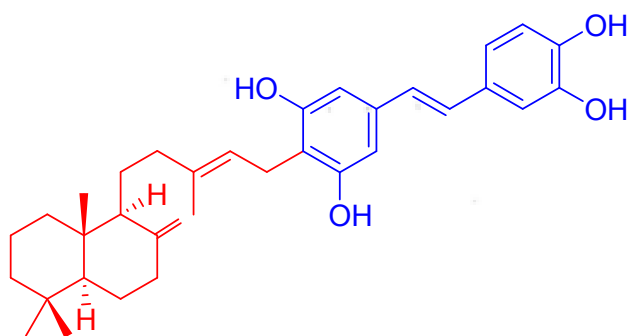

Figure S10. UV spectrum of denticulatain A (1)

Optical rotation measurement

Model : P-1020 (A060460638)

| No.  | Sample   | Mode   | Data    | Monitor Blank    | Temp. Cell<br>Temp Point | Date<br>Comment<br>Sample Name                          | Light Filter<br>Operator | Cycle Time<br>Integ Time |
|------|----------|--------|---------|------------------|--------------------------|---------------------------------------------------------|--------------------------|--------------------------|
| No.1 | 14 (1/3) | Sp.Rot | 22.2670 | 0.0167<br>0.0000 | 13.2<br>10.00<br>Cell    | Tue Dec 13 11:03:35 2011<br>0.00750g/mlMeOH<br>SMDL-15A | Na<br>589nm              | 2 sec<br>10 sec          |
| No.2 | 14 (2/3) | Sp.Rot | 23.3330 | 0.0175<br>0.0000 | 13.2<br>10.00<br>Cell    | Tue Dec 13 11:03:49 2011<br>0.00750g/mlMeOH<br>SMDL-15A | Na<br>589nm              | 2 sec<br>10 sec          |
| No.3 | 14 (3/3) | Sp.Rot | 22.0000 | 0.0165<br>0.0000 | 13.3<br>10.00<br>Cell    | Tue Dec 13 11:04:02 2011<br>0.00750g/mlMeOH<br>SMDL-15A | Na<br>589nm              | 2 sec<br>10 sec          |

+ 22.7444°

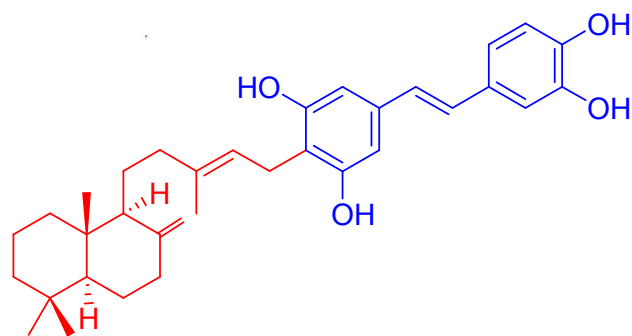

Figure S12. ORD spectrum of denticulatain A (1)



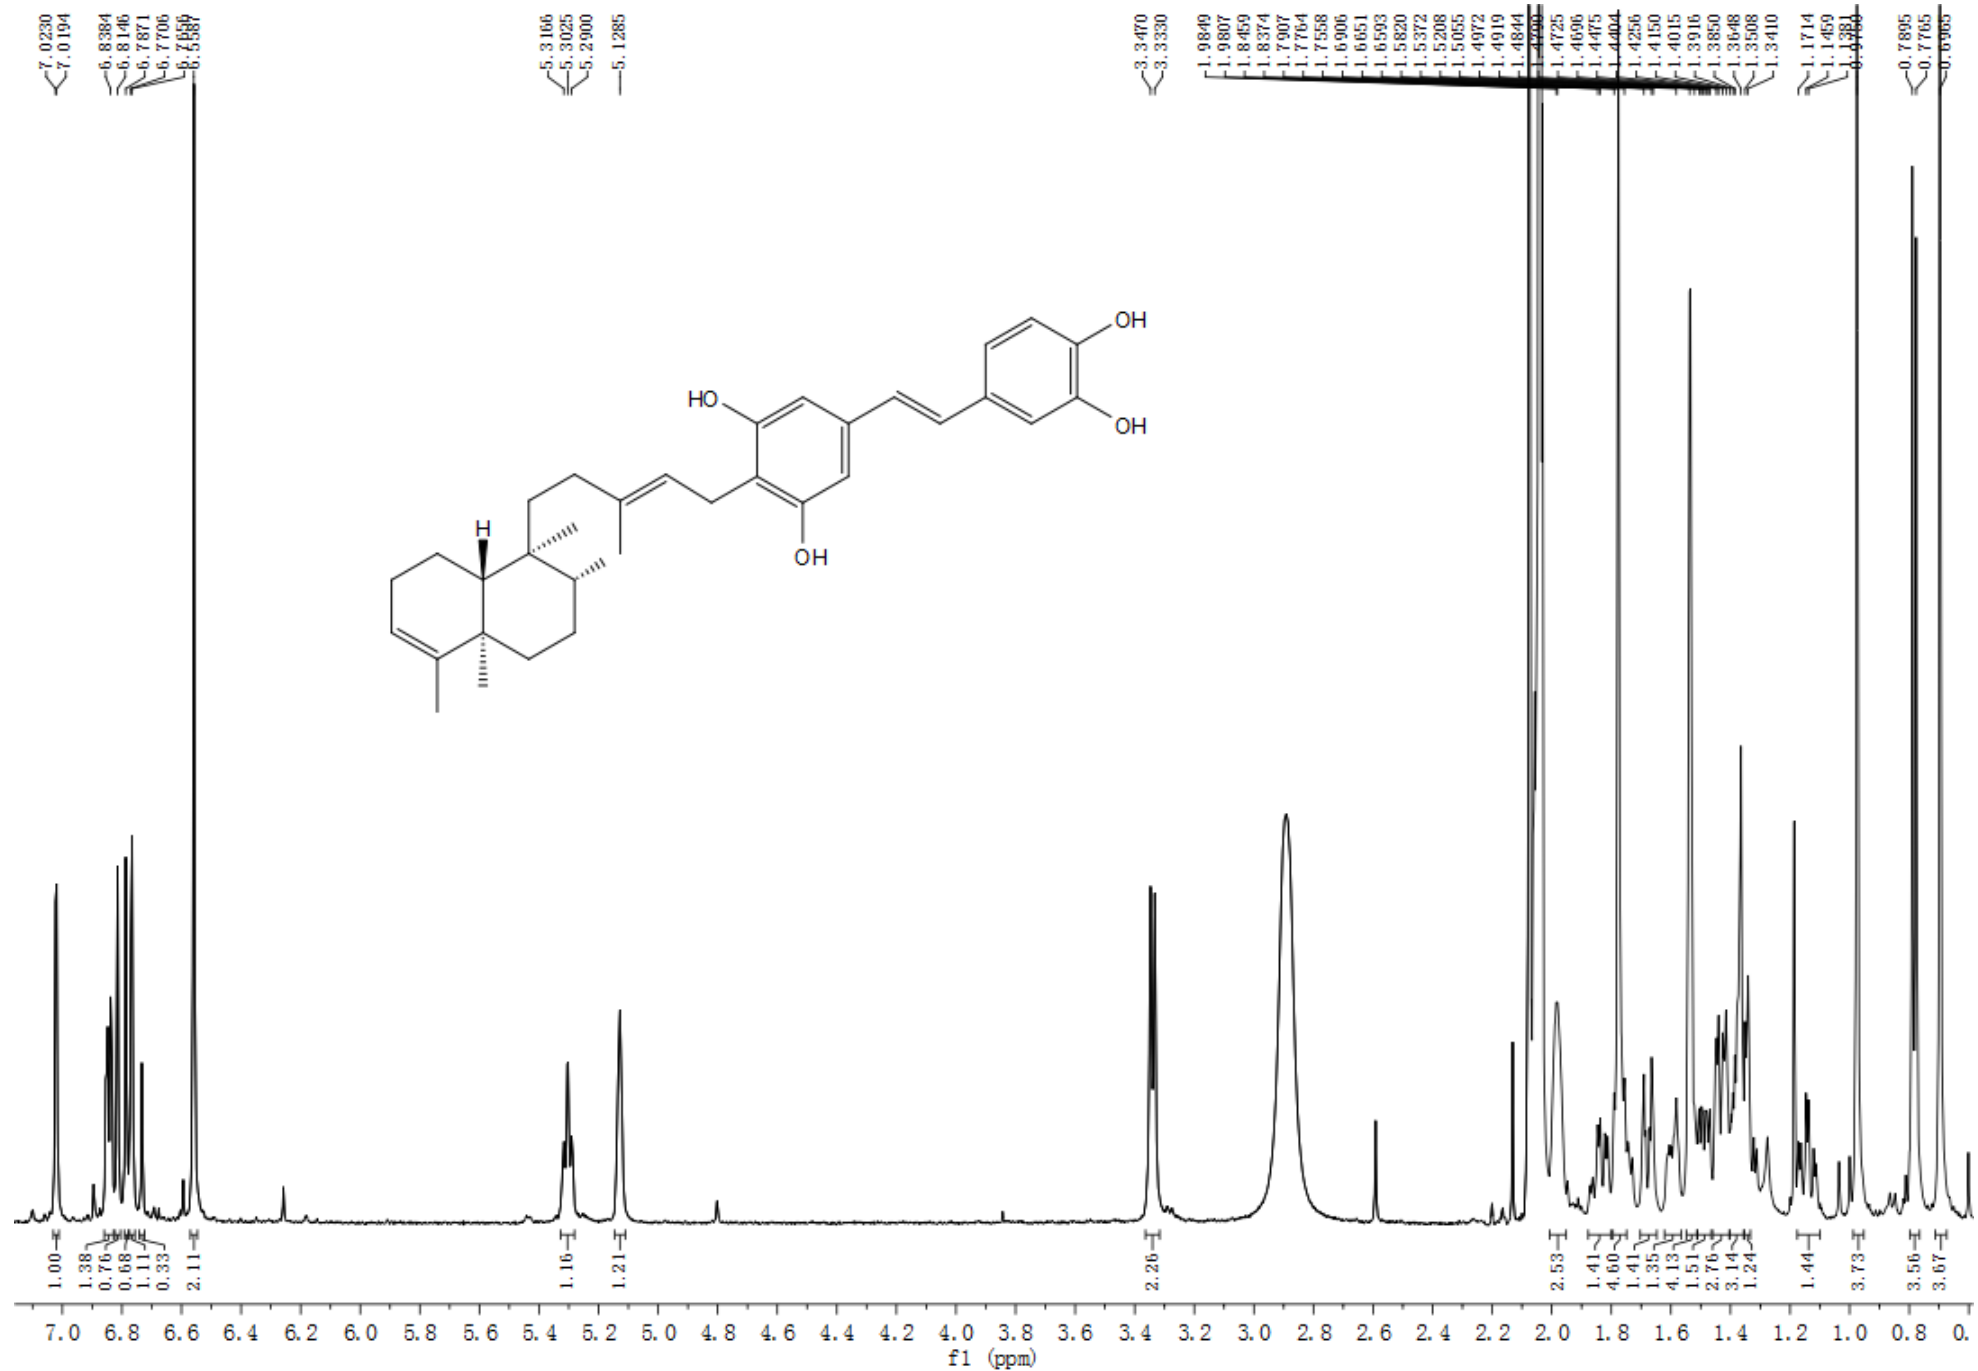

Figure S13. <sup>1</sup>H NMR spectrum of denticulatoin B (2)

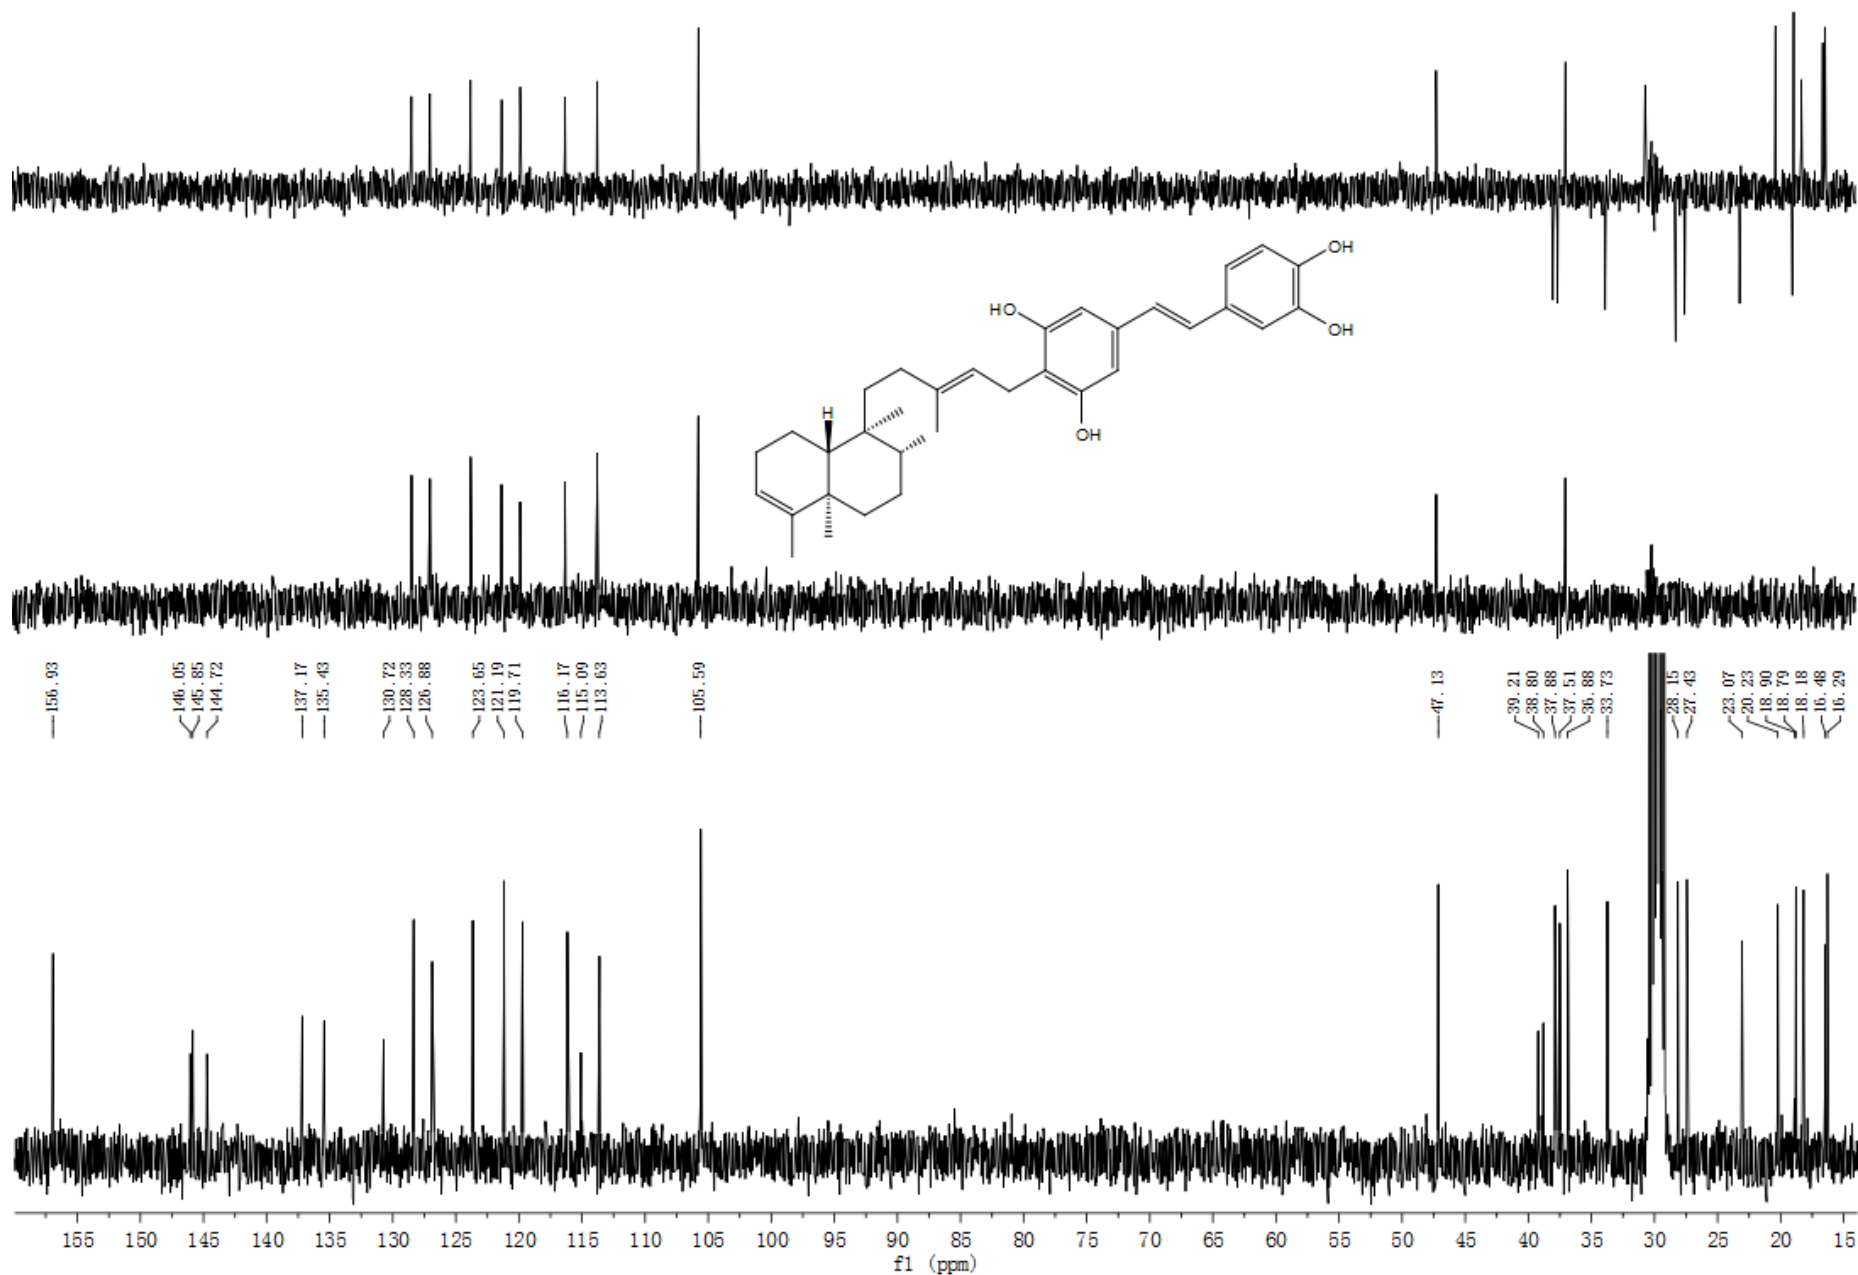

Figure S14.  $^{13}\text{C}$  NMR spectrum of denticulatain B (2)

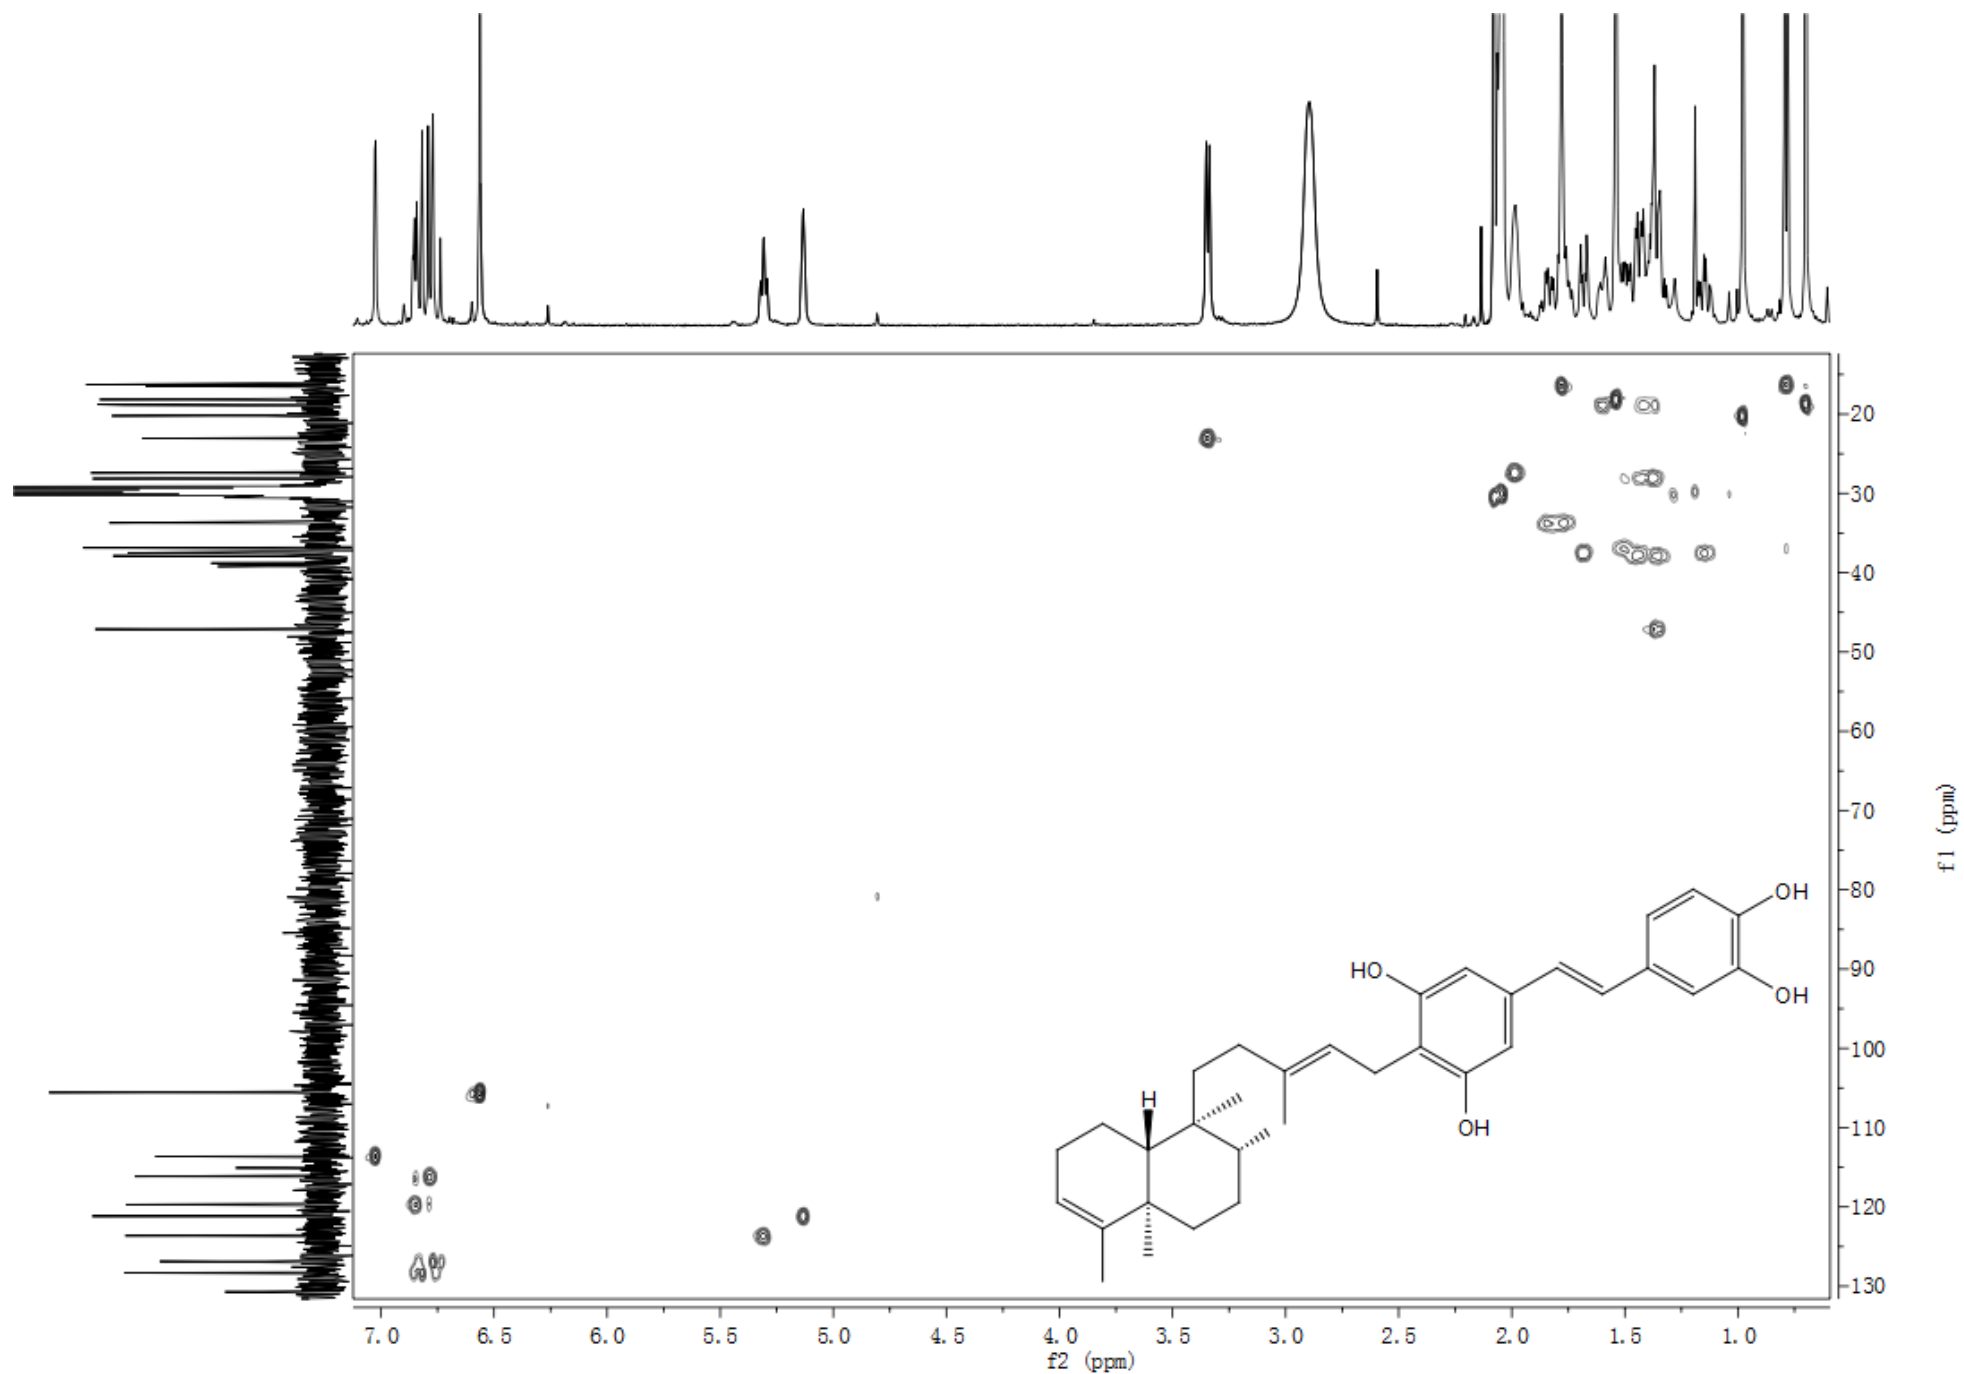

Figure S15. HSQC spectrum of denticulatin B (2)

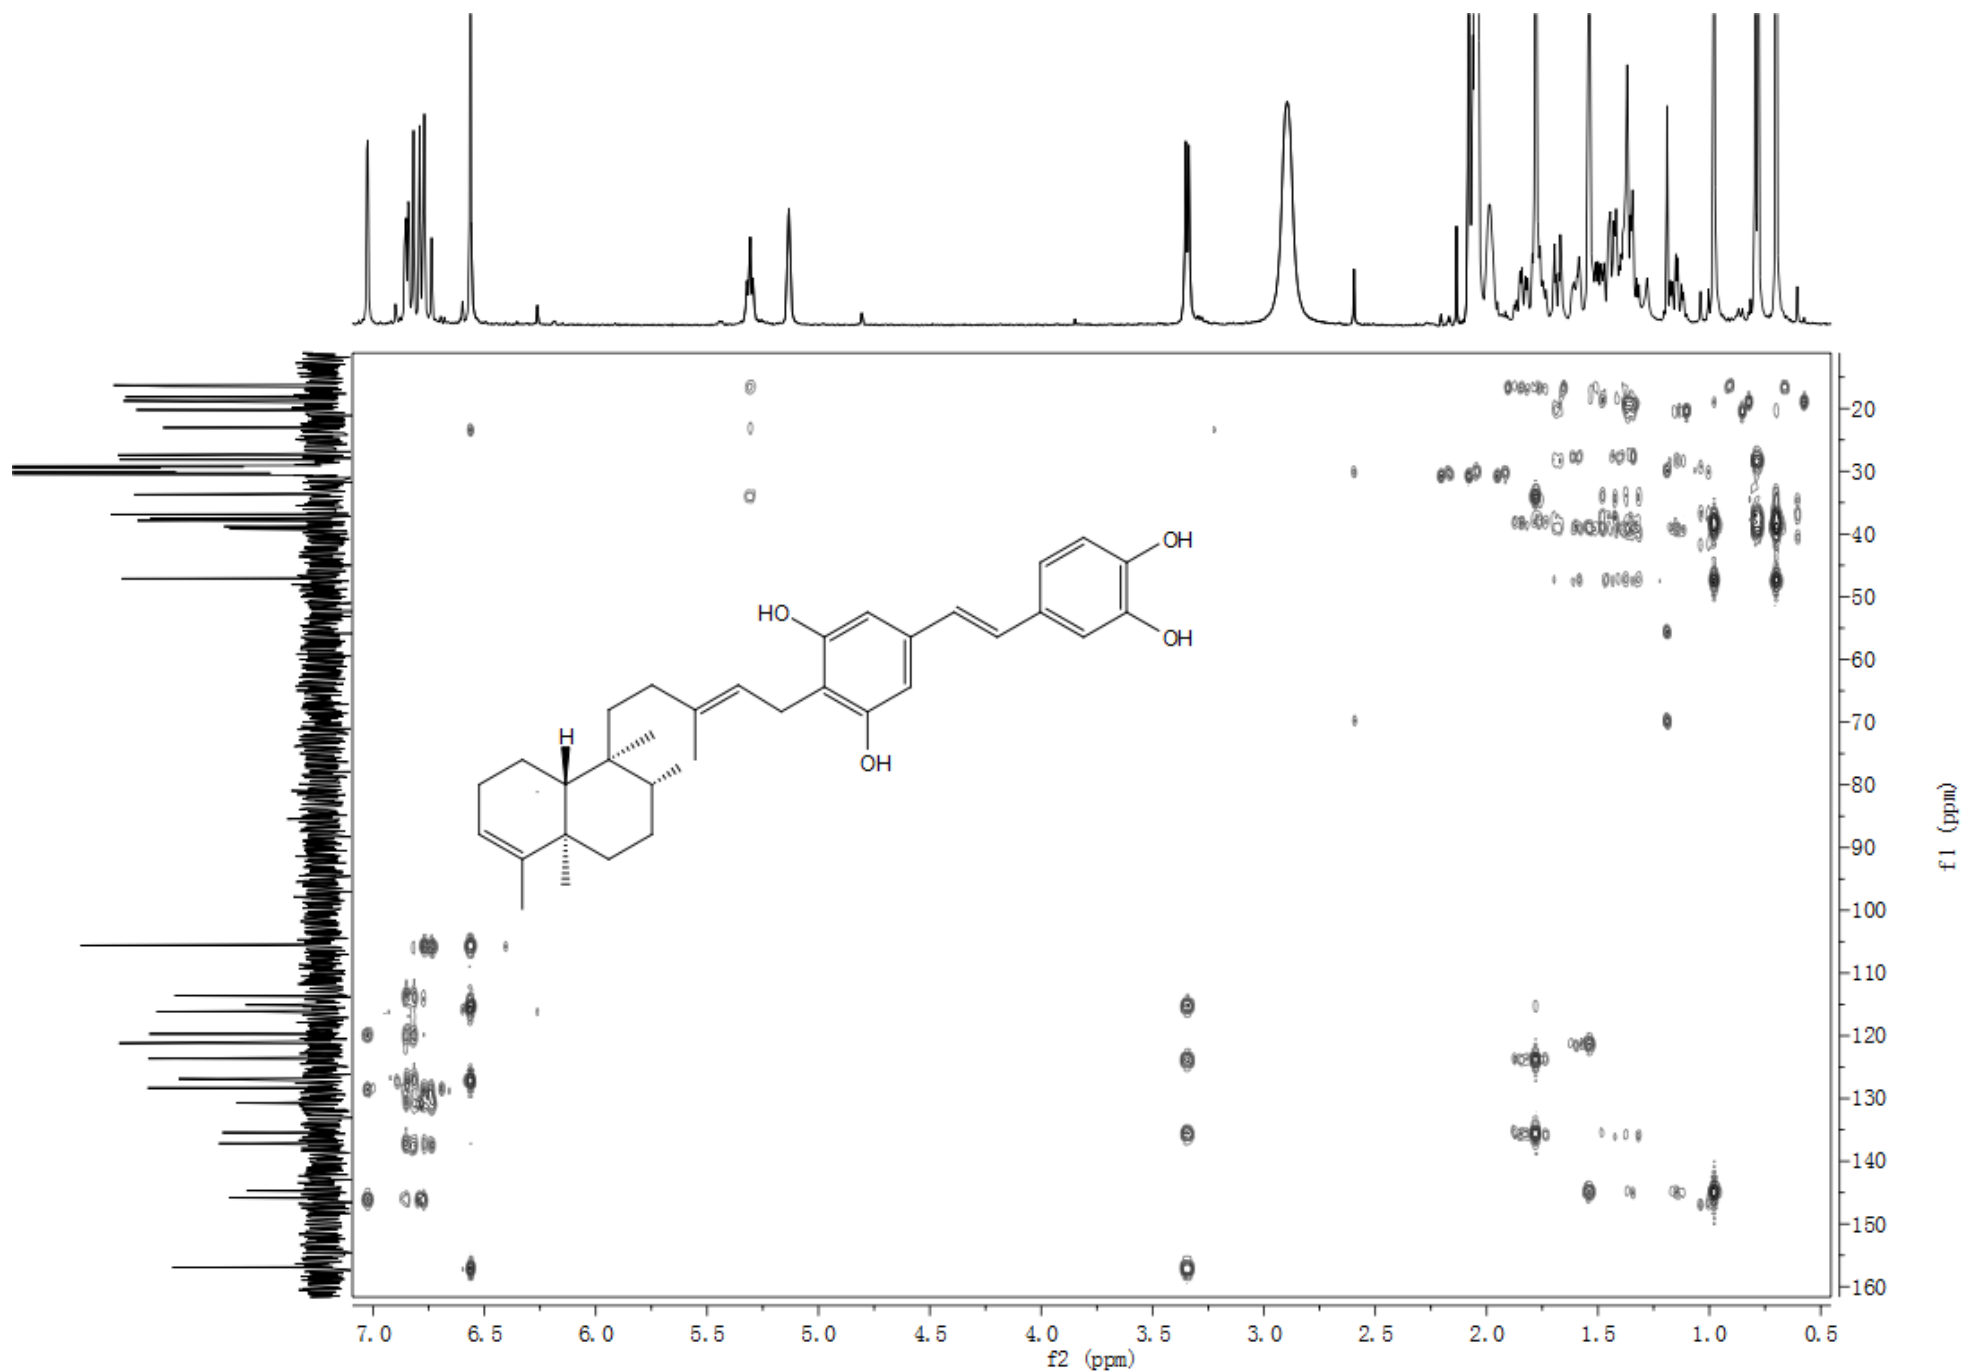

Figure S16. HMBC spectrum of denticulatin B (2)

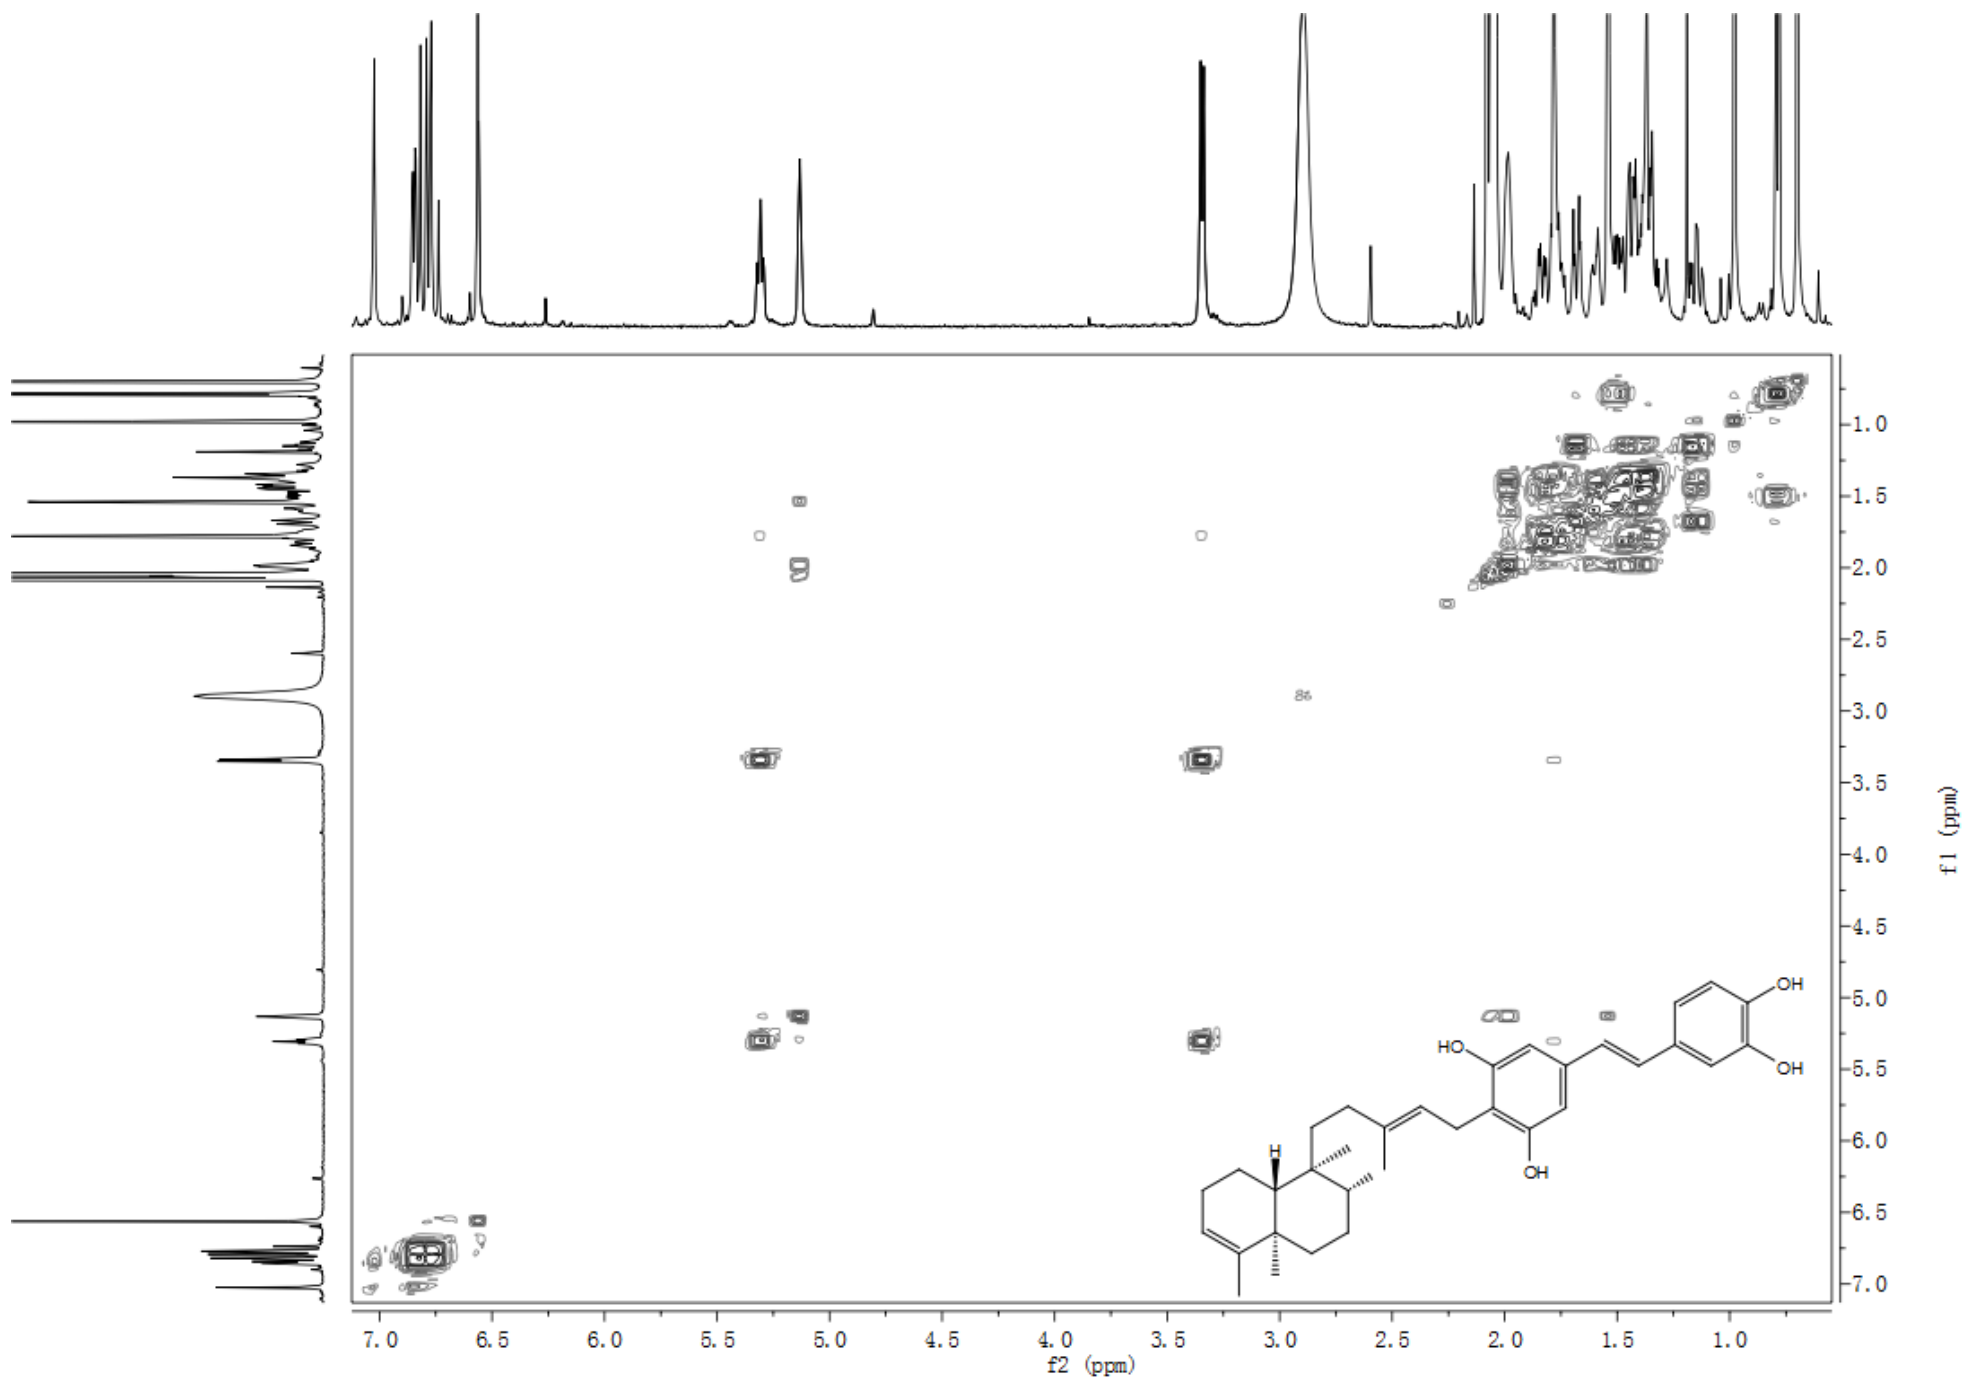

Figure S17.  $^1\text{H}$ - $^1\text{H}$  COSY spectrum of denticulatin B (2)

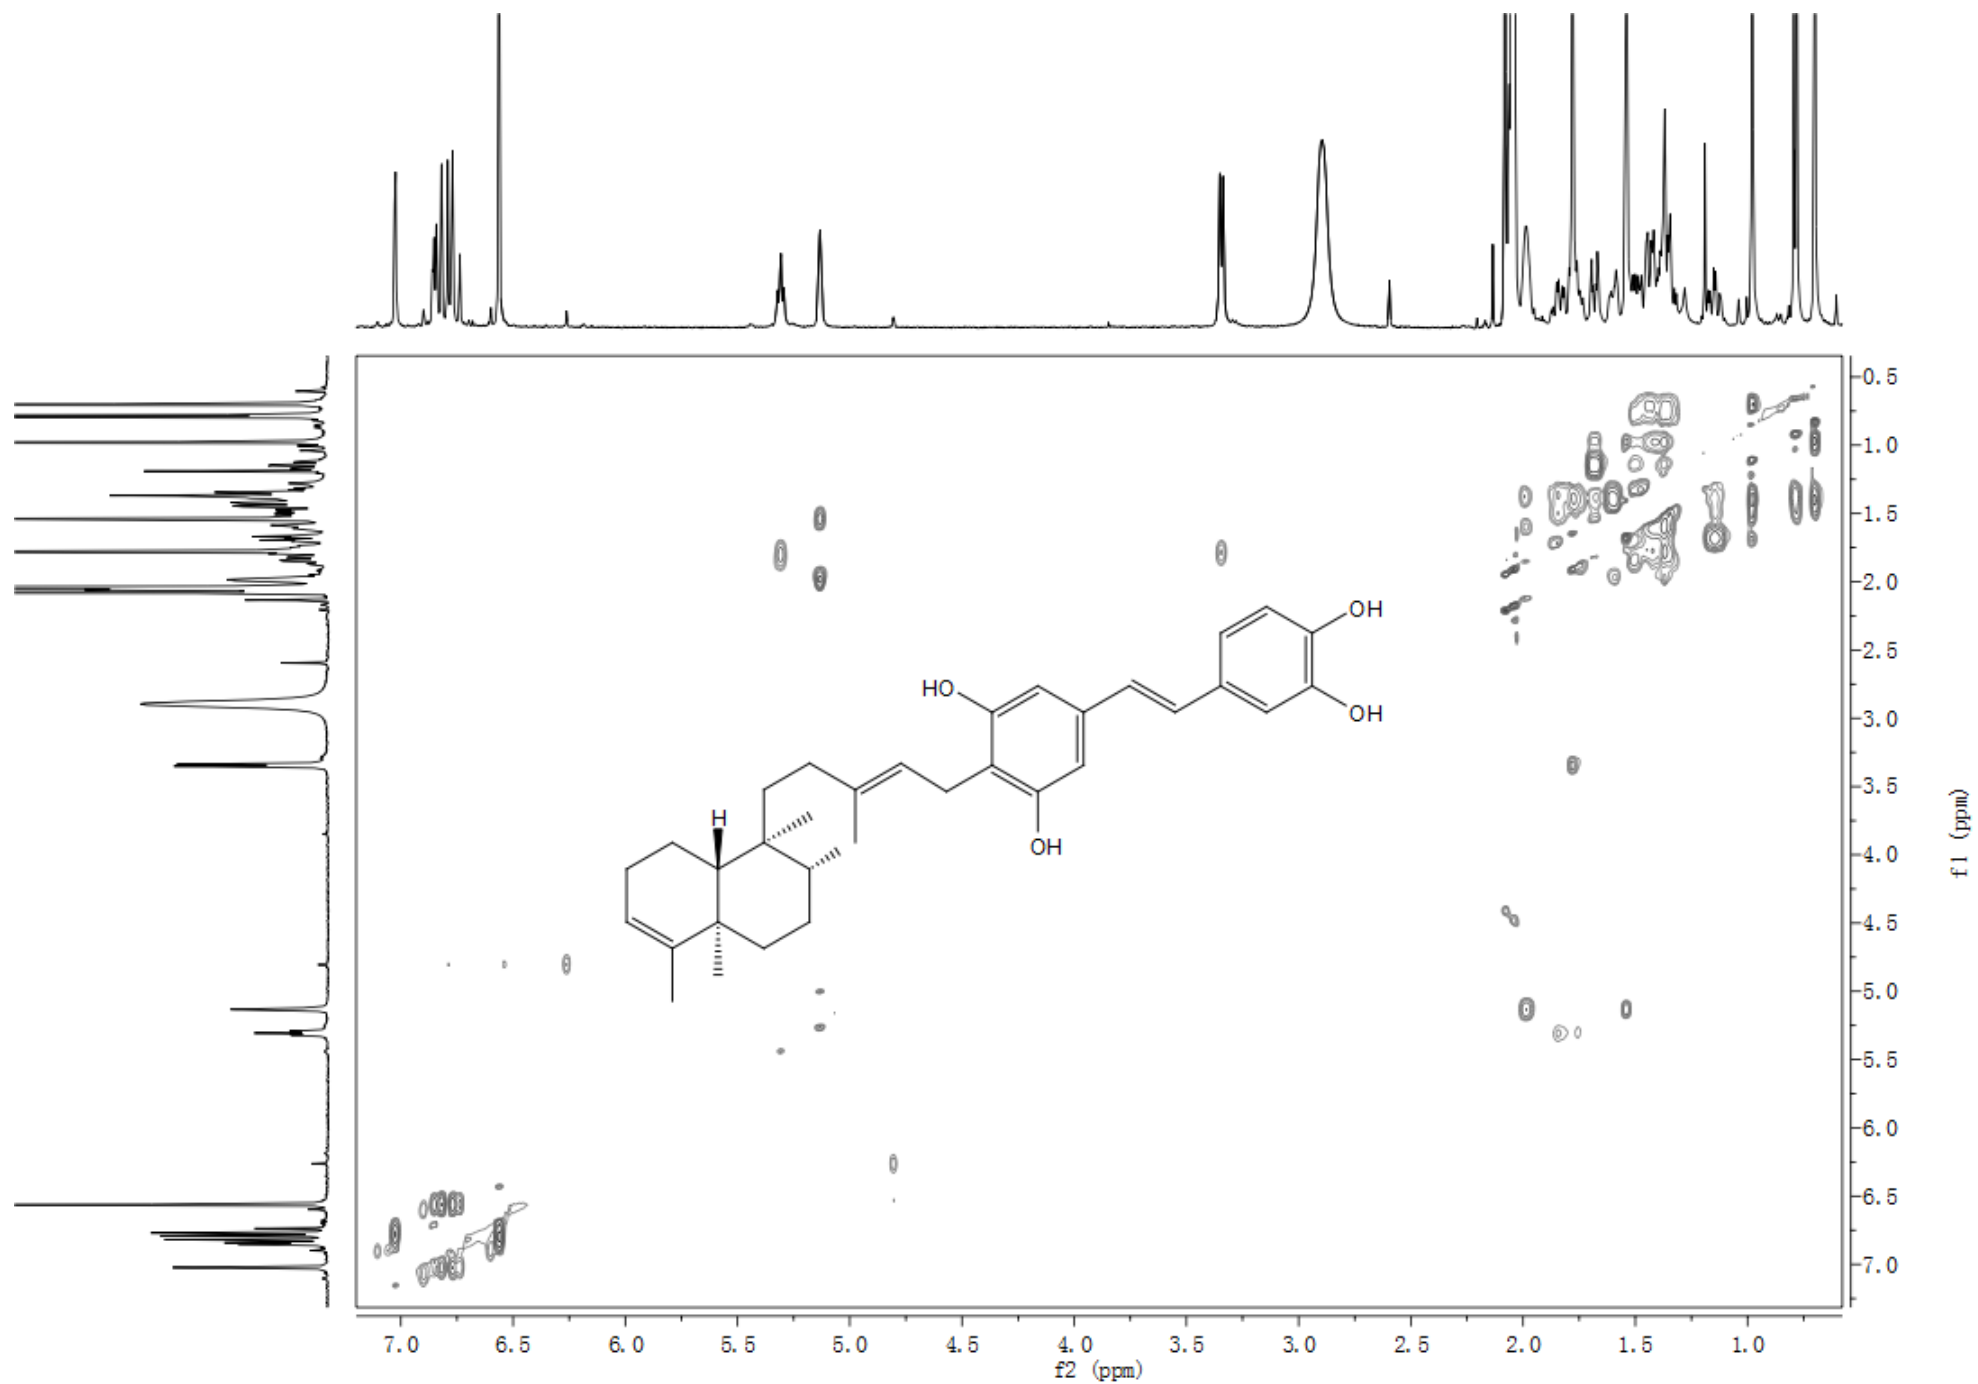

Figure S18. ROESY spectrum of denticulatin B (**2**)

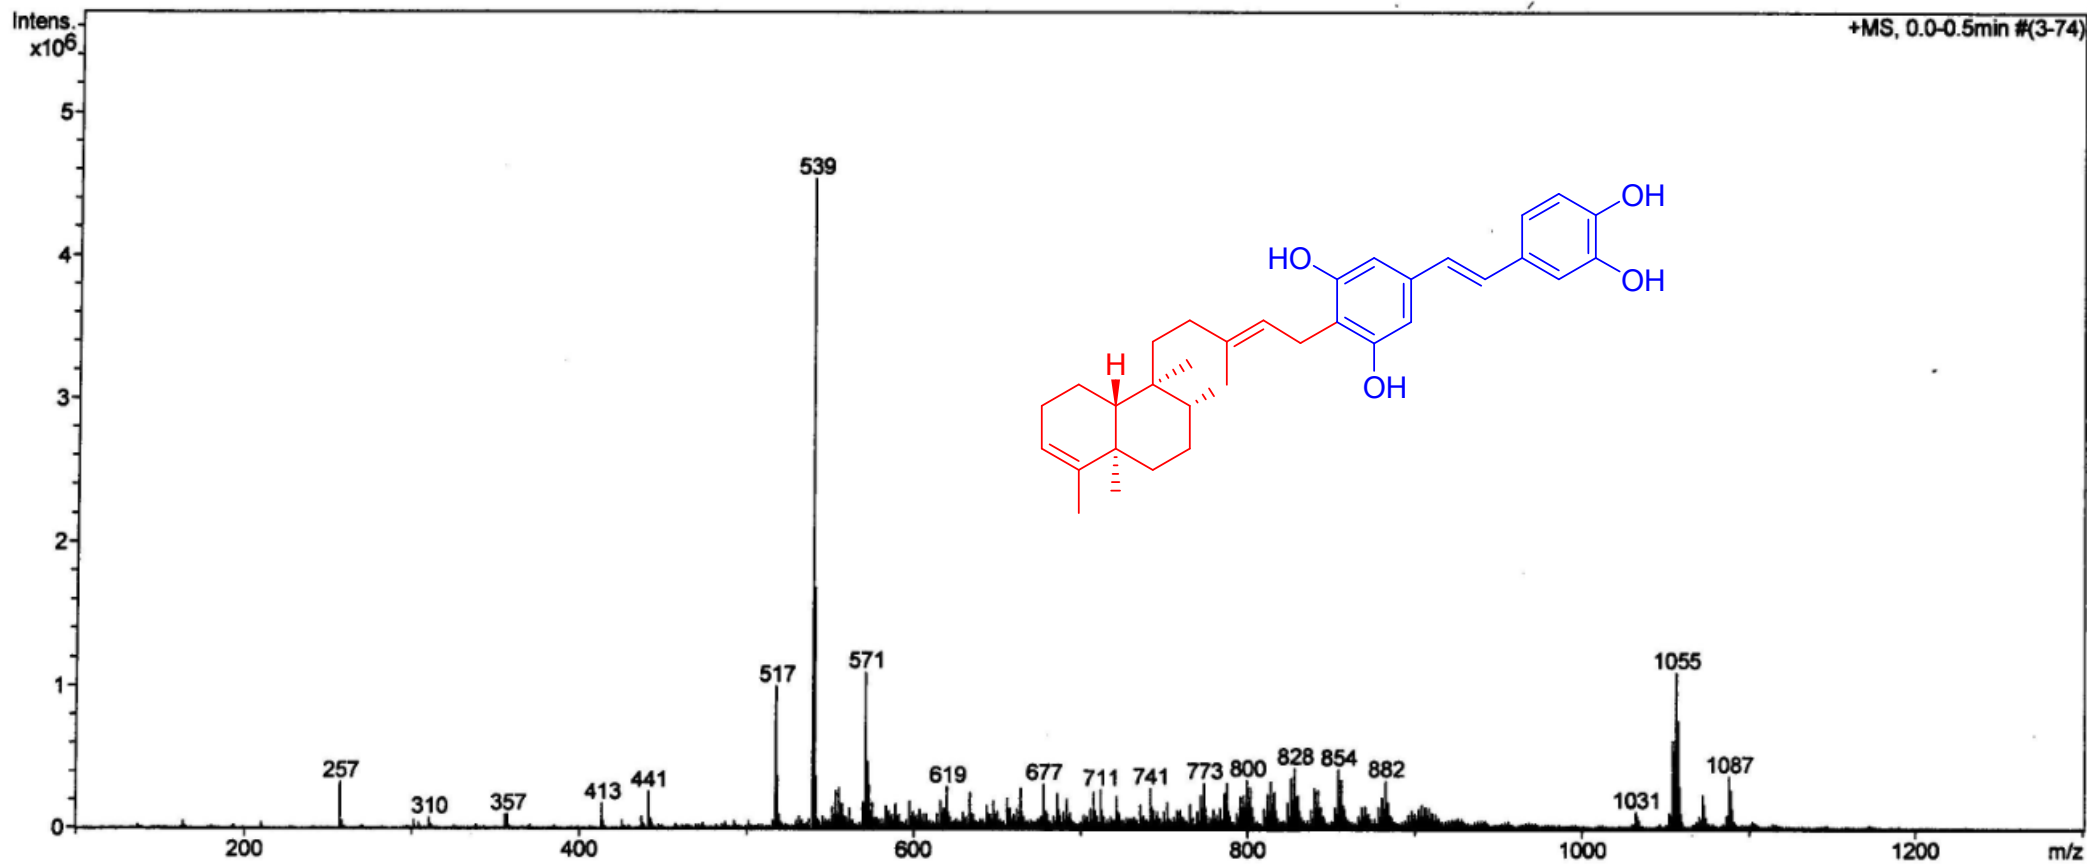

Figure S19. ESIMS of denticulatin B (2)

## Elemental composition calculator

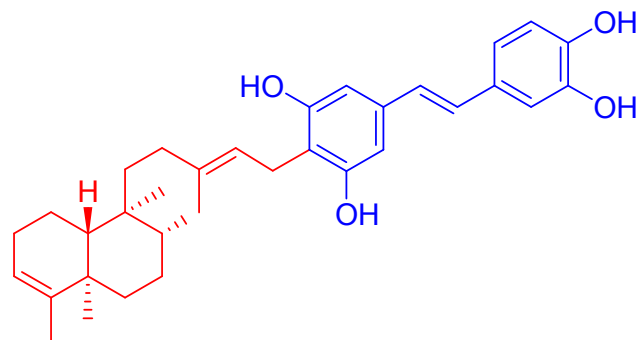

Target m/z: +539.3130 amu  
 Tolerance: +10.0000 ppm  
 Result type: Elemental  
 Max num of results: 1000  
 Min DBE: -10.0000 Max DBE: +60.0000  
 Electron state: OddAndEven  
 Num of charges: 0  
 Add water: N/A  
 Add proton: N/A  
 File Name: 111206ESIA smdl-15b.wiff

|    | Elements | Min Number | Max Number |
|----|----------|------------|------------|
| 1  | 2H       | 0          | 0          |
| 2  | Br       | 0          | 0          |
| 3  | C        | 0          | 200        |
| 4  | Cl       | 0          | 0          |
| 5  | F        | 0          | 0          |
| 6  | H        | 0          | 400        |
| 7  | I        | 0          | 0          |
| 8  | K        | 0          | 0          |
| 9  | N        | 0          | 0          |
| 10 | Na       | 1          | 1          |
| 11 | O        | 2          | 5          |



|    |    |   |   |
|----|----|---|---|
| 12 | P  | 0 | 0 |
| 13 | Pt | 0 | 0 |
| 14 | S  | 0 | 0 |
| 15 | Si | 0 | 0 |

|   | Formula       | Calculated m/z (amu) | mDa Error | PPM Error | DBE  |
|---|---------------|----------------------|-----------|-----------|------|
| 1 | C34 H44 O4 Na | 539.3137             | -0.7300   | -1.3536   | 12.5 |

Figure S20. HRESIMS of denticulatin B (2)

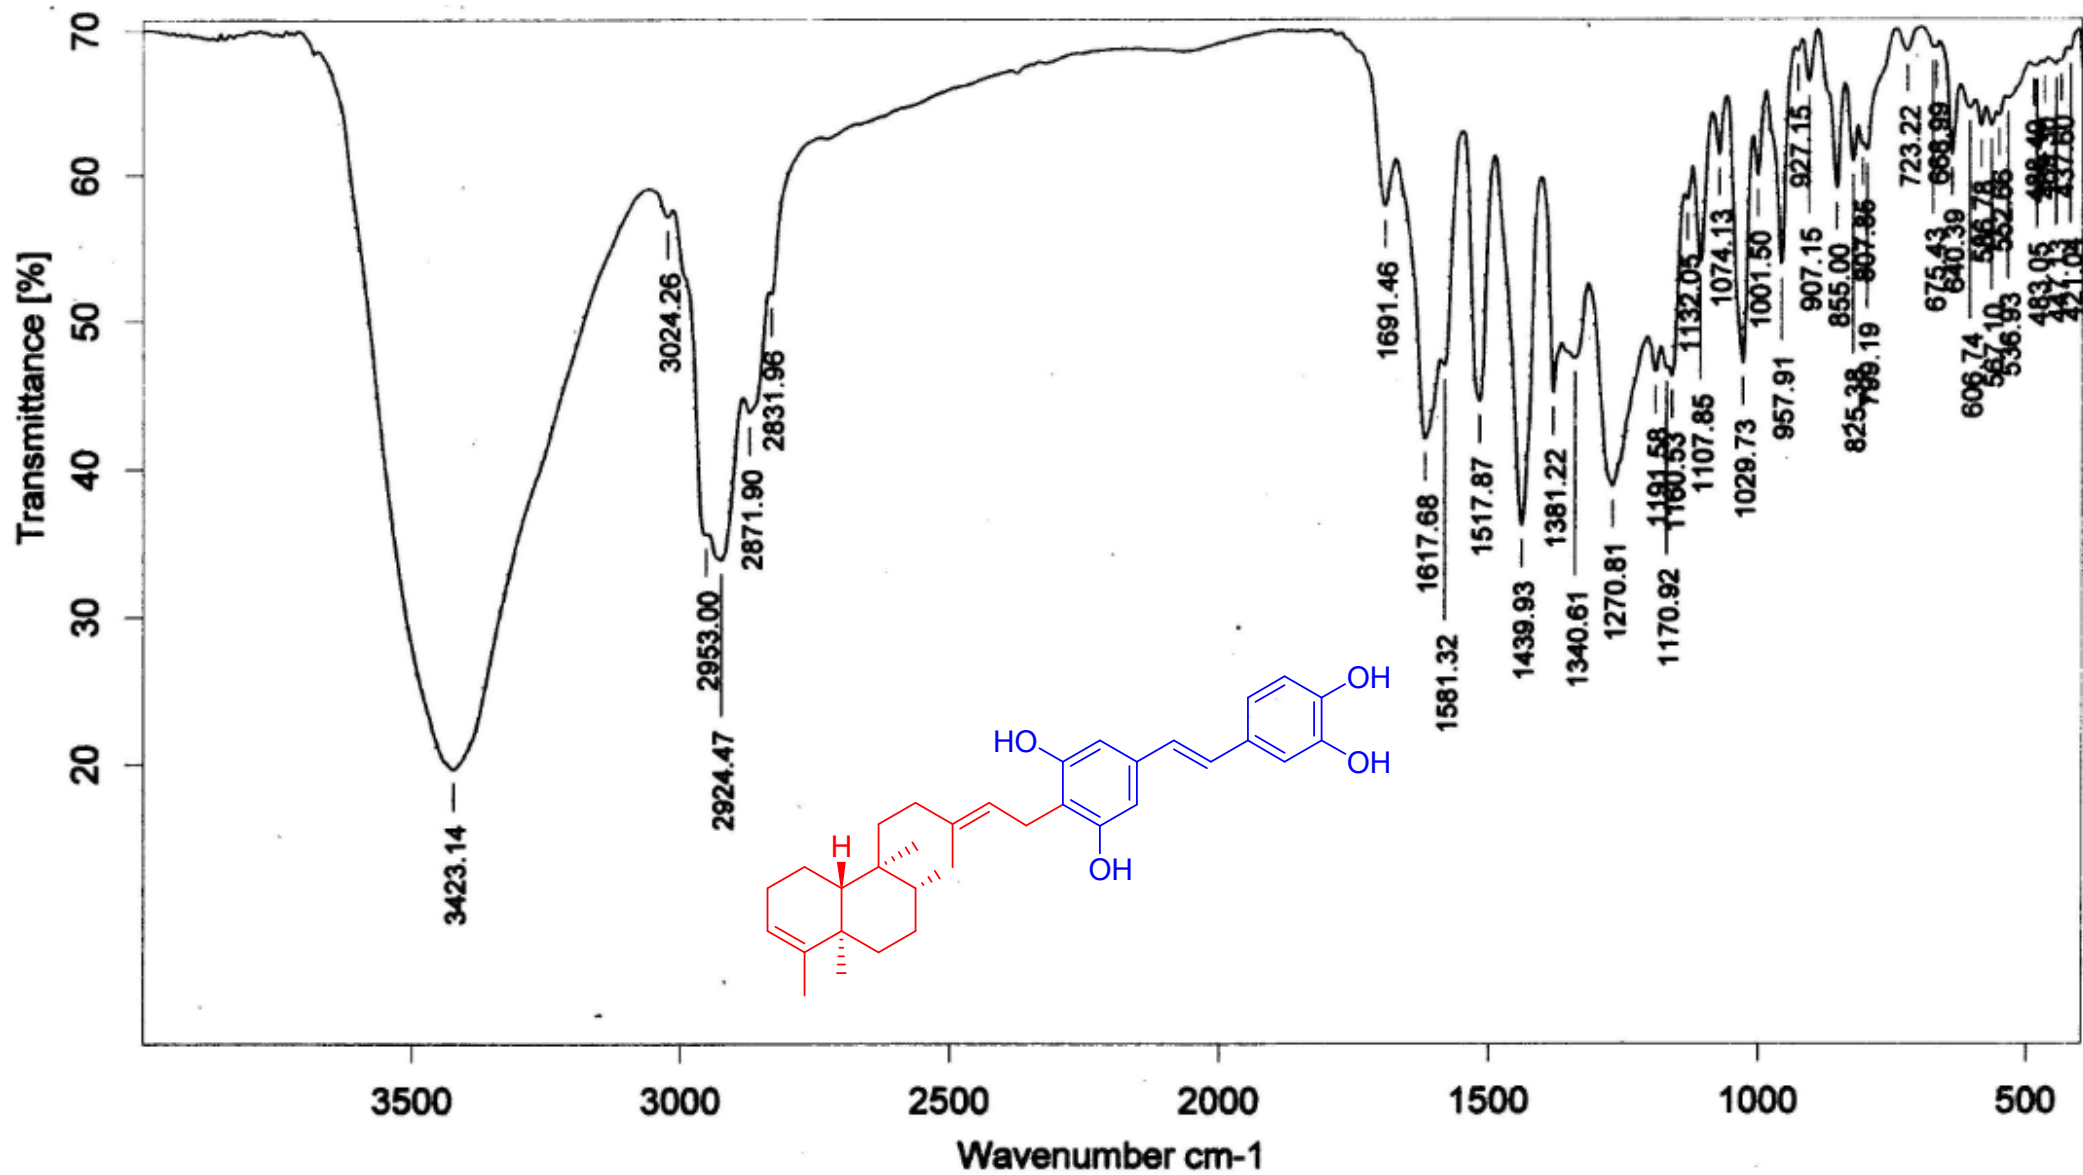

Figure S21. IR spectrum of denticulatain B (2)

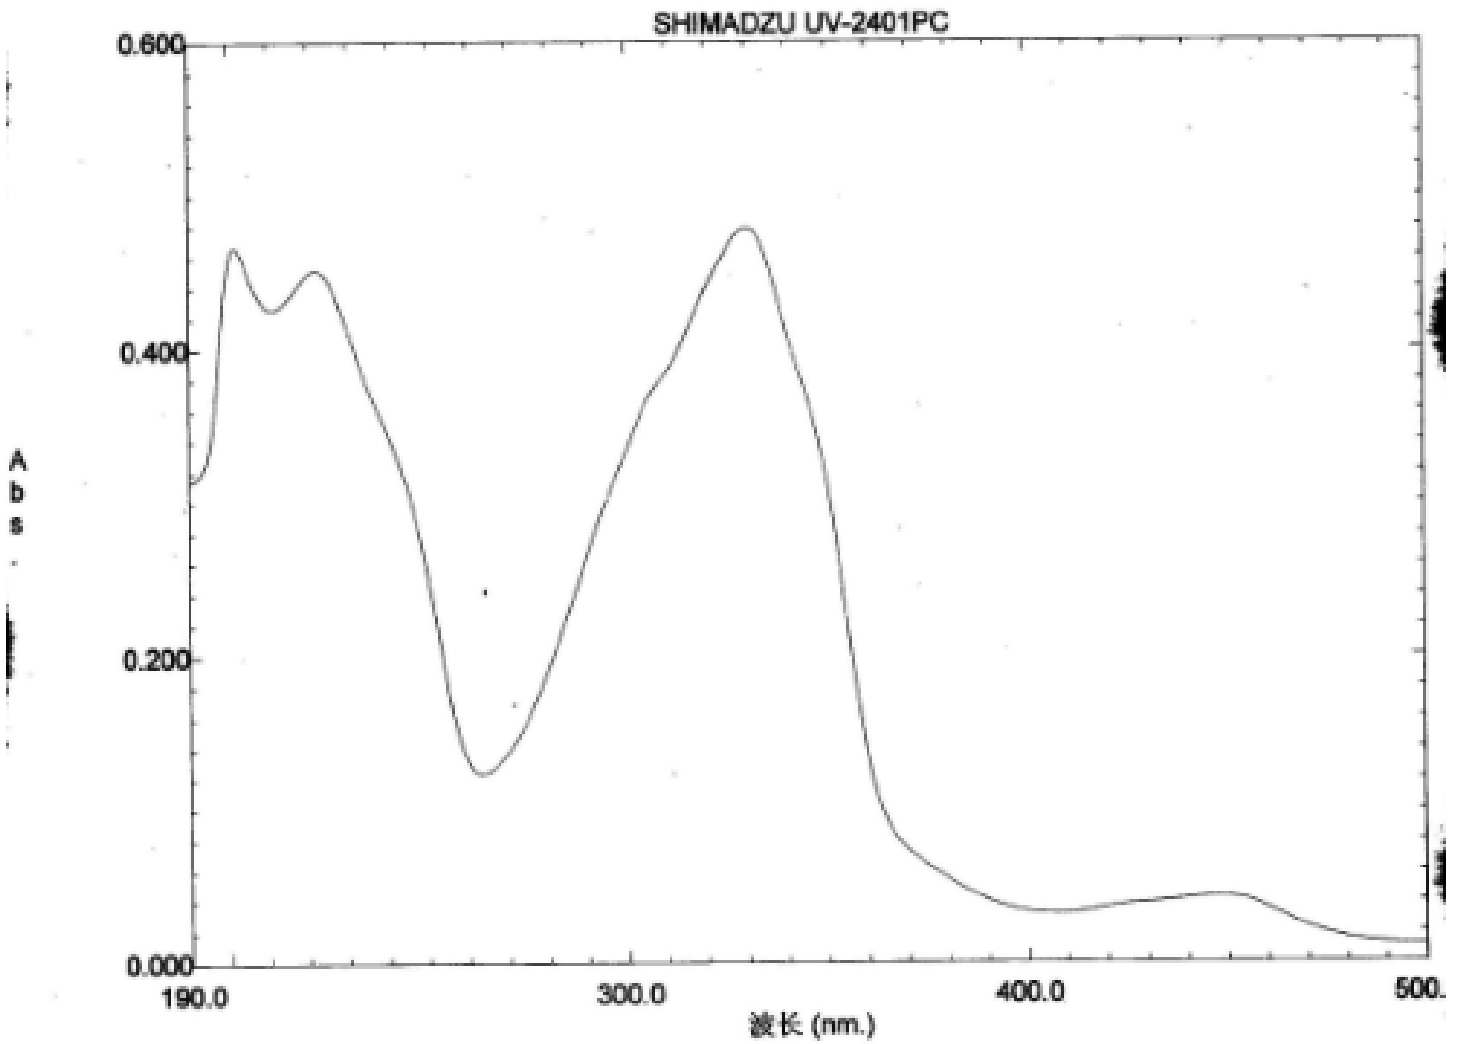

文件名: SMDL-15B

SMDL-15B

创建于: 15:13 11-12-04  
数据: 原始

样品浓度: 0.0128毫克/毫升  
溶剂: 甲醇

测量模式: Abs.  
扫描速度: 中速  
狭缝: 5.0  
采样间隔: 0.5

| 序 | 波长 (nm.) | Abs.   |
|---|----------|--------|
| 1 | 448.00   | 0.0429 |
| 2 | 330.50   | 0.4785 |
| 3 | 222.00   | 0.4519 |
| 4 | 201.50   | 0.4665 |

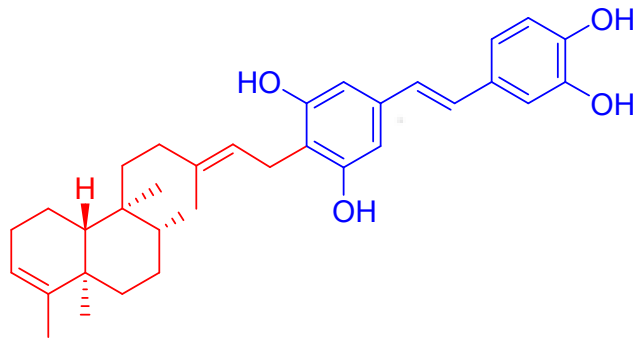

Figure S22. UV spectrum of denticulatain B (2)

Optical rotation measurement

Model : P-1020 (A060460638)

| No.  | Sample   | Mode   | Data     | Monitor Blank     | Temp. Cell Temp Point | Date Comment Sample Name                                | Light Filter Operator | Cycle Time Integ Time |
|------|----------|--------|----------|-------------------|-----------------------|---------------------------------------------------------|-----------------------|-----------------------|
| No.1 | 17 (1/3) | Sp.Rot | -28.2220 | -0.0127<br>0.0000 | 13.5<br>10.00<br>Cell | Tue Dec 13 11:26:26 2011<br>0.00450g/mlMeOH<br>SMDL-15B | Na<br>589nm           | 2 sec<br>10 sec       |
| No.2 | 17 (2/3) | Sp.Rot | -29.7780 | -0.0134<br>0.0000 | 13.5<br>10.00<br>Cell | Tue Dec 13 11:26:39 2011<br>0.00450g/mlMeOH<br>SMDL-15B | Na<br>589nm           | 2 sec<br>10 sec       |
| No.3 | 17 (3/3) | Sp.Rot | -29.3330 | -0.0132<br>0.0000 | 13.5<br>10.00<br>Cell | Tue Dec 13 11:26:53 2011<br>0.00450g/mlMeOH<br>SMDL-15B | Na<br>589nm           | 2 sec<br>10 sec       |

-29.1111<sup>3</sup>

Figure S24. ORD spectrum of denticulatain B (2)

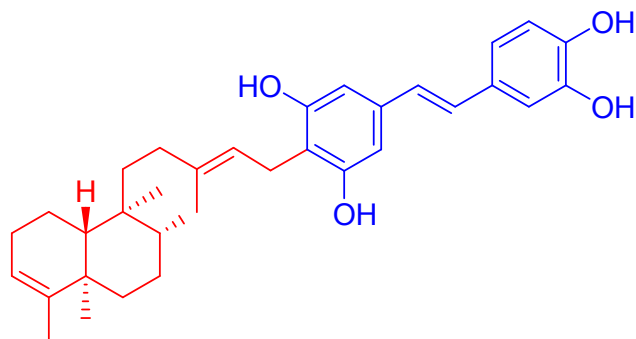

Supplement: c4ra14805c1.pdf [file c4ra14805c1.pdf]
